# Genomic Abelian Finite Groups

Robersy Sanchez<sup>1</sup> and Jesús Barreto<sup>2</sup>

<sup>1</sup>Department of Biology. Pennsylvania State University, University Park, PA 16802.

E-mail: [rus547@psu.edu](mailto:rus547@psu.edu)

ORCID: <https://orcid.org/0000-0002-5246-1453>

<sup>2</sup>Universidad Central "Marta Abreu" de Las Villas. Santa Clara. Cuba.

E-mail: [barretouclv@gmail.com](mailto:barretouclv@gmail.com)

<sup>1</sup> Corresponding author:

[rus547@psu.edu](mailto:rus547@psu.edu)

## Abstract

Experimental studies reveal that genome architecture splits into DNA sequence domains suggesting a well-structured genomic architecture, where, for each species, genome populations are integrated by individual mutational variants. Herein, we show that, consistent with the fundamental theorem of Abelian finite groups, the architecture of population genomes from the same or closed related species can be quantitatively represented in terms of the direct sum of homocyclic Abelian groups of prime-power order defined on the genetic code and on the set of DNA bases, where populations can be stratified into subpopulations with the same canonical decomposition into  $p$ -groups. Through concrete examples we show that the architectures of current annotated genomic regions including (but not limited to) transcription factors binding-motif, promoter regulatory boxes, exon and intron arrangement associated to gene splicing are subjects for feasible modeling as decomposable Abelian  $p$ -groups. Moreover, we show that the epigenomic variations induced by diseases or environmental changes also can be represented as an Abelian group decomposable into homocyclic Abelian  $p$ -groups. The nexus between the direct sum of homocycle Abelian  $p$ -groups and the endomorphism ring paved the ways to unveil unsuspected stochastic-deterministic logical propositions ruling the ensemble of genomic regions. Our study aims to set the basis for concrete applications of the theory in computational biology and bioinformatics. Consistently with this goal, a computational tool designed for the analysis of fixed mutational events in gene/genome populations

33 represented as endomorphisms and automorphisms is provided. Results suggest that complex local  
34 architectures and evolutionary features no evident through the direct experimentation can be unveiled  
35 through the analysis of the endomorphism ring and the subsequent application of machine learning  
36 approaches for the identification of stochastic-deterministic logical rules (reflecting the evolutionary  
37 pressure on the region) constraining the set of possible mutational events (represented as  
38 homomorphisms) and the evolutionary paths.

39

40

41 **Keywords:** Genomics, Genetic code, Abelian groups, genome algebra, automorphism, mutational  
42 event

## 43 **1 Introduction**

44 The analysis of the *genome architecture* is one of biggest challenges for the current and future  
45 genomics. Herein, with the term *genome architecture* we are adopting the definition given by Koonin  
46 [1]: *Genome architecture can be defined as the totality of non-random arrangements of functional*  
47 *elements (genes, regulatory regions, etc.) in the genome.*

48 Current bioinformatic tools make possible faster genome annotation process (identification of  
49 locations for genes, regulatory regions, intron-exon boundaries, repeats, etc.) than some years ago  
50 [2]. Current experimental genomic studies suggest that genome architectures must obey specific  
51 mathematical biophysics rules [3–6]. Experimental results points to an injective relationship: *DNA*  
52 *sequence*  $\rightarrow$  *3D chromatin architecture* [3,4,6], and failures of DNA repair mechanisms in preserving  
53 the integrity of the DNA sequences lead to dysfunctional genomic rearrangements which frequently  
54 are reported in several diseases [5]. Hence, ***some hierarchical logic is inherent to the genetic***  
55 ***information system that makes it feasible for mathematical studies.*** In particular, there exist  
56 mathematical biology reasons to analyze the genetic information system as a communication system  
57 [7–10].

58 We propose the study of genome architecture in the context of population genomics, where all  
59 the variability constrained by the evolutionary pressure is expressed. Although the random nature of  
60 the mutational process, only a small fraction of mutations is fixed in genomic populations. In  
61 particular, fixation events, ultimately guided by random genetic drift and positive selection are  
62 constrained by the genetic code, which permits a probabilistic estimation of the evolutionary  
63 mutational cost by simulating the evolutionary process as an optimization process with genetic  
64 algorithms [11].

### 65 **1.1 The genetic code**

66 Under the assumption that current forms of life evolved from simple primordial cells with very simple  
67 genomic structure and robust coding apparatus, the genetic code is a fundamental link to the primeval

68 form of life, which played an essential role on the primordial architecture. The genetic code is the  
69 cornerstone of life on earth, the fundamental communication code from the genetic information  
70 system [8,9]. The code-words from the genetic code are given in the alphabet of four DNA bases  
71  $\mathfrak{B} = \{A, C, G, T\}$  and integrates a set of 64 DNA base-triplets  $\{XYZ\}$  also named *codons*, where  
72  $X, Y, Z \in \mathfrak{B}$ . Each codon encodes the information for one amino acid and each amino acid is  
73 encoded by one or more codons. Hence, at biomolecular level, the genetic code constitutes a set of  
74 biochemical rules (mathematically expressed as an injective mapping: *codon*  $\rightarrow$  *amino acid*) used by  
75 living cells to translate information encoded within genetic material into proteins, which sets the basis  
76 for our understanding of the mathematical logic inherent to the genetic information system [9,12].

77 The subjacent idea to impose a group structure on the set of codons resides on that the genetic  
78 code is the code of a communication system, the genetic information system [8,13,14]. As suggested  
79 by Andrews and Boss [15]: “*In codes used for electrical transmission of engineering signals, **group***  
80 ***structure is imposed to increase efficiency and reduce error. Similarly, the group characteristics of***  
81 ***codon redundancy could serve to transmit additional information superimposed on the messages***  
82 ***directing amino acid order in protein synthesis**”. As in the current human communication systems*  
83 [16], to impose a group structure (on biophysical basis) on the set of codons facilitates a better  
84 understanding and evaluation of the error performance and efficiency of the genetic message carried  
85 in the chromosomes across generations [15].

## 86 **1.2 The genetic code algebraic structures**

87 The basis of the current study are algebraic structures (specifically groups structures) defined on the  
88 set of bases and on the codon sets. We assume that readers are familiar with algebraic structures like  
89 group, ring, and the classical mapping defined on them, homomorphisms, automorphism, and  
90 translations. For readers not familiar with this subject, a brief basic introduction to these definitions  
91 is given in the Appendix.

92 **The meaning of group operations.** Group operations are defined on the sets of DNA bases and  
93 codons, are associated to physicochemical or/and biophysical relationships between DNA bases and

94 between codons and aminoacids. In other words, a proper definition of a group operation on the set  
95 of bases or on the set of codons will encode the physicochemical or/and biophysical relationships  
96 between the set's elements. Thus, by group operations defined on the set of bases or on the set of  
97 codons, we understand an *encoding* applied to represent specified physicochemical or/and biophysical  
98 relationships as group operations between the elements of the set. Then, we shall say that such an  
99 encoding permits the *representation* of DNA bases, codons, genes, and genomic sequences as  
100 elements from algebraic structures.

101 Obviously, depending on which physicochemical or biophysical relationship is under scrutiny,  
102 different encodings of the group operations can be defined on the sets of bases and codons, as shown  
103 in reference [17]. The meaning of the group operations has been subjects of the references where the  
104 corresponding groups have been reported [11,17–20]. For example, in the DNA double helix,  
105 nucleotide bases are paired following specific physicochemical relationships: 1) *the chemical type*  
106 *sets the main rule for a pairing: a purine base is paired with a pyrimidine*, 2) *paired bases must have*  
107 *the same hydrogen-bonding capability*. These physicochemical relationships rule the DNA base  
108 pairing: G::C (*three hydrogen bonds*) and A::T (*two hydrogen bonds*). In this scenario, the sum  
109 operation is defined in [20], over the ordered set of bases  $\mathfrak{B} = \{D, A, C, G, T\}$ , in such a way that the  
110 DNA complementary bases are also complementary algebraic elements.

111 **Pioneering works on the genetic code algebraic structure.** Pioneering works were made in the 70s  
112 [15,21–23], just few years after Nirenberg won the Nobel Prize in Physiology or Medicine (in 1968)  
113 for his seminal work on the genetic code. Andrews and Boss proposed the cyclic groups of DNA  
114 bases, which is isomorphic to the Abelian group defined on the set of integers modulo 4,  $\mathbb{Z}_4$  ( $\mathbb{Z} / 4\mathbb{Z}$   
115 ) [15]. Their approach also considered the base representation with cyclic group of complex numbers.  
116 Further studies were focused on operational groups applied to transform bases and base-doublet into  
117 each other. Dankworth and Neubert (1975) proposed the Klein-4-group structure ( $K$ ) of doublet-  
118 exchange operators and applied the direct product  $K \times K$  to study the symmetries of genetic-code  
119 doublets [22]. The four dimensional hypercube structure of the genetic-code doublets ( $K \times K$  group)  
120 was later studied by Bergman and Jungck (1979) [23].

121 Efforts with the application of *group representation theory* to study the origin and evolution of  
122 the genetic code were made by Honors and Hornos [24,25], and extended to Lie superalgebras by  
123 Forger and Sachse [26]. However, these efforts on the application of group representation theory are  
124 heavily relying on physical interpretations disconnected from concrete molecular biology context,  
125 which made hard a further application on concrete molecular biology or computational biology  
126 studies, and on bioinformatic applications. Here, it is important to recall that the *representation* of  
127 DNA bases, codons, genes, and genomic sequences as elements from algebraic structures must not  
128 be confused with the term *group representation* typically used in algebra referring to the theory of  
129 representations of algebraic structures or, particularly, the *group representation theory*. Nevertheless,  
130 once a group structure has been defined, for example, in the set of codons, a further application of the  
131 group representation theory can be developed.

132 In the current study, we aim to show that all possible genomic regions and, consequently, whole  
133 chromosomes can be described by way of finite Abelian groups which can be split into the direct sum  
134 of homocyclic 2-groups and 5-groups defined on the genetic code. Concepts and basic applications  
135 are introduced step by step, sometimes with self-evident statements for a reader familiar with  
136 molecular biology. However, it will be shown that the algebraic modeling is addressed to unveil more  
137 complex relationships between molecular evolutionary process and the genomic architecture than  
138 those eyes-visible relationships. This goal will be evidenced on section 3.2. Our algebraic model  
139 approach is intended to set the theoretical basis for further studies addressed to unveil and to  
140 understand the rules on how genomes are built. Concrete examples and an implementation in a R  
141 package are provided to pave the way for future computational and bioinformatic applications. A  
142 graphical summary of the modeling of DNA genomic regions proposed here is shown in Fig 1.

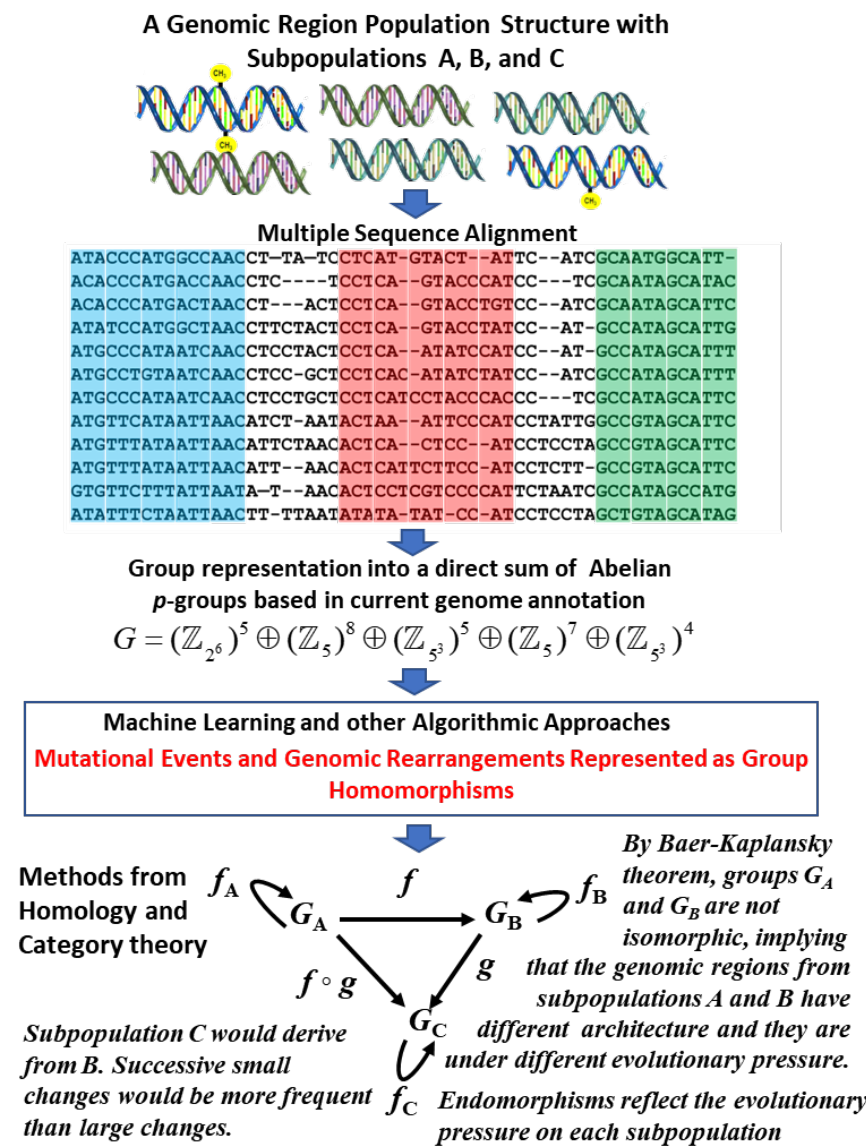

143  
 144 **Fig 1.** Graphical of the summary showing the bioinformatic and analytical steps followed in the  
 145 algebraic modeling proposed in current work.

## 146 2 Materials and Methods

### 147 2.1 Preceding models applied in the current work

148 Of particular interest are the Abelian  $p$ -groups defined on the set of DNA bases  $\mathfrak{B} = \{A, C, G, T\}$

149 and on the set of 64 codons  $C_g = \{XYZ \mid X, Y, Z \in \mathfrak{B}\}$ , which are applied to modeling the

150 physicochemical relationships between DNA bases in the codons [11,18]. Herein, for application

151 purposes in computational biology and bioinformatics addressed to the study of the genome

152 architecture, we focused our study on Abelian  $p$ -groups defined on  $\mathfrak{B}$  and on  $C_g$  isomorphic to the

153 groups  $\mathbb{Z}_{p_i^{\alpha_i}}$ ,  $p_i^{\alpha_i} \in \{2^2, 2^6\}$ , and on  $\mathfrak{B}_+ = \{A, C, G, T, D\}$  and  $C_{g_+} = \{XYZ \mid X, Y, Z \in \mathfrak{B}_+\}$ ,  
154  $p_i^{\alpha_i} \in \{5, 5^3\}$ , as presented in references [11, 17–20].

155 Setting different physicochemical restrictions on the definition of groups operations leads to  
156 the 24 possible algebraic representations of the genetic code [17]. In particular, the Abelian  $p$ -group  
157 representations on the set  $C_G = \mathfrak{B} \times \mathfrak{B} \times \mathfrak{B}$  and  $C_{G_+} = \mathfrak{B}_+ \times \mathfrak{B}_+ \times \mathfrak{B}_+$  ( $\mathfrak{B}_+ = \{A, C, G, T, D\}$ ,  
158 where  $D$  stands for an alternative base, see below) are isomorphic to Abelian groups defined on  $\mathbb{Z}_{2^2}^3$   
159 and  $\mathbb{Z}_5^3$ , respectively. These group structures lead to 24 (isomorphic) geometrical representations of  
160 the genetic code as cubes inserted in three-dimensional space [11, 17, 19, 20] (Fig 2 and SI Figs 1 and  
161 3).

162 As shown in reference [11], a group structure isomorphic to the symmetric group of degree  
163 four  $S_4$  (preserving the group operations previously defined on the codon set) can be defined in set  
164 the 24 genetic-code algebraic representations or in the set 24 cubes. Since the definition of a sum  
165 operation over the base set is equivalent to define an order on it, *cubes are named according to the*  
166 *base order on them*. For example, the cube shown in Fig 2 is denoted as ACGT, which correspond to  
167 the group operation defined on the ordered set  $\mathfrak{B} = \{A, C, G, T, D\}$  (the ‘dual’ cube TGCA is shown  
168 in SI Fig 2 [11]). Simulation of the evolutionary mutational process with the application of genetic  
169 algorithms indicates that fixed mutational events found in different protein populations are *very*  
170 *restrictive* in the sense that the optimal evolutionary codon distances are reached for specific models  
171 of genetic-code cube or for specific combination of genetic-code cube models [11]. In the present  
172 work, it will be shown that codon mutational events represented in terms of automorphisms can be  
173 also restrictive for specific genetic-code cube models (section 3.1).

174 All the Abelian  $p$ -group included in the current work are oriented to the study of the mutational  
175 process [11, 17–20]. That is, since we are interested in those structures that permit the analysis and  
176 quantitative description of the mutational process in organismal populations, where mutational event  
177 can be represented by means of endomorphisms, automorphisms, and translations on the defined



178 group, we do not include algebraic structures designed to study the origin and evolution of the genetic  
 179 code [11,18]. The genetic code is taken as currently is, without over-impose any evolutionary  
 180 hypothesis on it.

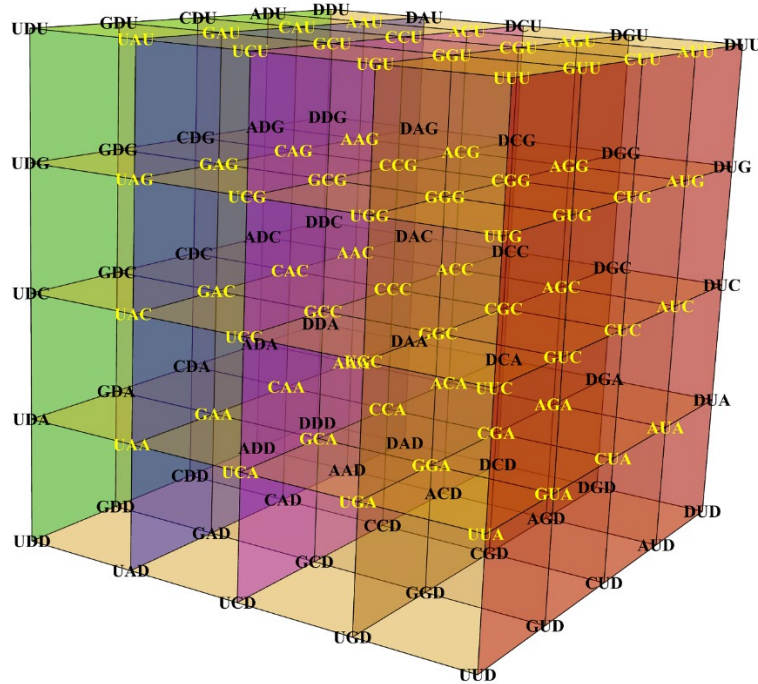

181  
 182 **Fig 2.** Geometrical representation of the genetic code as a cube inserted in three-dimensional space.  
 183 The 2-group and 5-group representation defined on the sets  $C_G = \mathfrak{B} \times \mathfrak{B} \times \mathfrak{B}$  and  
 184  $C_{G_+} = \mathfrak{B}_+ \times \mathfrak{B}_+ \times \mathfrak{B}_+$  isomorphic to the groups defined on  $\mathbb{Z}_2^3$  and  $\mathbb{Z}_5^3$ , respectively, lead to the  
 185 geometrical representations of the genetic code as a cube inserted in three-dimensional space. The  
 186 cube corresponding to the base-triplets with coordinates on  $\mathbb{Z}_2^3$  (yellow codons) is inserted in the  
 187 cube with codon coordinates on  $\mathbb{Z}_5^3$ . The extended base-triplets including the alternative base D (in  
 188 black) are located on the cartesian coordinate planes. Codons encoding for amino acids with similar  
 189 physicochemical properties are located on the same vertical plane (for more details on the cube  
 190 description see also SI Fig 1 and reference [11,17,19,20]).

191  
 192 A general model also consider Abelian 5-groups that includes a dummy variable (denoted by  
 193 letter D), which extends the DNA alphabet to five letters. The usefulness of including a fifth base in  
 194 the evolutionary analysis was shown in reference [20], where two evolutionary models, an algebraic  
 195 and a stationary Markov (process) models, were applied to phylogenetic analysis reaching (both  
 196 models) greater discriminatory power than the (now) classical Tamura-Neil evolutionary (Markov)  
 197 model based on four DNA alphabet [27]. Depending on the concrete application, letter “D” will take  
 198 a different value. The possible values in the context of the present modeling are: 1) the gap symbol

199 “-”, which stands for insertion deletion/mutations in the multiple sequence alignment (MSA) of DNA  
200 sequences, 2) alternative wobble base pairing (e.g., bases such as: inosine (in eukaryotes), agmatine  
201 (in archaea), and lysidine (in bacteria) [17,21,22]), and 3) 5-methylcytosine ( $C^m$ ) and N-6-  
202 methyladenine ( $A^m$ ) when intended for epigenetic studies.

203 A concrete application of the extended genetic-code cubes over the Galois field  $GF(5)$  to the  
204 simulation of the mutational process proposed in reference [11] would be particularly relevant to  
205 predict immunoescape epitope variants originated in populations of pathogenic microorganisms and  
206 viruses. In addition, examples provided (here) on the application of the algebraic model to DNA  
207 methylation (on 5-methylcytosine and on N-6-methyladenine) suggest its importance for epigenetic  
208 studies. The analysis of the fixed mutational events on genes populations revealed that the mutational  
209 process can be described by automorphisms on different cubes or sets of cubes [11]. The best genetic-  
210 code cubes describing the mutational process on a given gene population are selected with the  
211 application of an optimization algorithm (evolutionary (genetic) algorithms) using multiple sequence  
212 alignment as raw data [11].

213 It is worthy to notice that, for all mentioned Abelian  $p$ -groups, the calculus can be  
214 accomplished as symbolic computation on the set of DNA bases or on the set of codons (see e.g.,  
215 [18]). However, for practical purposes, we take advantage of the group isomorphisms. That is, after  
216 define group structures on the sets of bases and codons, for the sake of straightforward computation  
217 it is convenient to take advantage of the group isomorphisms with the Abelian  $p$ -groups like:  $\mathbb{Z}_{2^2}$ ,  
218  $\mathbb{Z}_{2^3}$ ,  $\mathbb{Z}_{2^6}$ ,  $\mathbb{Z}_5$ ,  $\mathbb{Z}_{5^3}$  and  $\mathbb{Z}_5^3$ , which will be used in our study instead of the original groups defined  
219 on the sets of bases and codons (base-triplets). An introductory summary on the mentioned algebraic  
220 structure defined on the set of codons is provided as supporting information in S1.

221 In the context of genetic-code algebraic structures, by the term “*representation*” of DNA bases,  
222 codons, genes, and genomic sequences as elements from algebraic structures, we understand the  
223 symbolic representation of the mentioned biomolecules and the physicochemical relationships  
224 between them by means of group operations defined on the given set of biomolecules.

## 225 **2.2 Aligned DNA sequences and data sets**

226 All the DNA sequence alignments and data sets used in this work are available within the R package  
227 *GenomAutomorphism* (version 1.0.0) [28]. In addition, the pairwise sequence alignments of SARS  
228 coronaviruses used the analyses shown in Fig 8a and b are also available at GitHub in:  
229 <https://github.com/genomaths/seqalignments/tree/master/COVID-19>. The multiple sequence  
230 alignment (MSA) of primate somatic cytochrome c and data description are available on GitHub at:  
231 <https://github.com/genomaths/seqalignments/tree/master/CYCS>. This MSA includes DNA protein-  
232 coding sequences from: human, gorilla, silvery gibbon, white cheeked gibbon, Francois langur, olive  
233 baboon, golden monkey, rhesus monkeys, gelada baboon, and orangutan. The MSA of primate  
234 BRCA1 (transcript variant 4) DNA repair gene used to compute the automorphism shown Fig 8d is  
235 available on GitHub at <https://github.com/genomaths/seqalignments/tree/master/BRCA1>. The MSA,  
236 coordinates and R script to create the sequence-logo from Fig 4 are given in the Supporting  
237 Information.

## 238 **2.3 Software applied for the mathematical and statistical analyses**

239 Results shown in Fig 8 and Fig 9 were obtained applying the *GenomAutomorphism* R package  
240 [28] (version 1.0.0), which is available at Bioconductor (the open source software for Bioinformatics,  
241 version: 3.16) and, also, in GitHub at: <https://github.com/genomaths/GenomAutomorphism>. The  
242 whole R script pipeline applied in the estimation of automorphisms (Fig 8) and decision tree (Fig 9)  
243 are available as tutorials (vignettes) at the *Geno Automorphism* website:  
244 <https://github.com/genomaths/GenomAutomorphismm>.

245 The estimation of the best fitted probability distribution shown in Fig 8f was accomplished  
246 with R package *usefr* available at GitHub: <https://github.com/genomaths/usefr>, and the goodness-of-  
247 fit tests are reported in the mentioned tutorials.

248 The genetic-code cube shown in Fig 2 was obtained from the Wolfram Mathematica Notebook:  
249 *Introduction to  $\mathbb{Z}_5$ -Genetic-Code vector space*, free available at  
250 [https://github.com/genomaths/GenomeAlgebra\\_SymmetricGroup](https://github.com/genomaths/GenomeAlgebra_SymmetricGroup).

## 251 2.4 Theoretical Model

252 According to the fundamental theorem of Abelian finite groups (FTAG) [29,30], any finite Abelian  
 253 group can be decomposed into a direct sum of homocyclic  $p$ -groups [29], i.e., a group in which the  
 254 order of every element is a power of a primer number  $p$ . Herein, it will be showed that, in a general  
 255 scenario, genomic regions and, consequently, whole genome populations from any species or close  
 256 related species, can be algebraically represented as a direct sum of Abelian homocyclic groups or  
 257 more specifically Abelian  $p$ -groups of *prime-power order*. The multiple sequence alignments (MSA)  
 258 of a given genomic region of  $N$  base-pair (bp) length can be represented as the direct sum:

$$259 \quad G = \left( \mathbb{Z}_{p_1^{\alpha_1}} \right)^{n_1} \oplus \left( \mathbb{Z}_{p_2^{\alpha_2}} \right)^{n_2} \oplus \dots \oplus \left( \mathbb{Z}_{p_k^{\alpha_k}} \right)^{n_k} \quad (1)$$

260 Where  $p_i^{\alpha_i} \in \{2, 5, 2^6, 5^3\}$ ,  $n_i$  stands for the number of cyclic groups  $\mathbb{Z}_{p_i^{\alpha_i}}$  integrating the homocyclic

261 group  $\left( \mathbb{Z}_{p_i^{\alpha_i}} \right)^{n_i} = \mathbb{Z}_{p_i^{\alpha_i}} \overset{n_i \text{ times}}{\oplus} \dots \oplus \mathbb{Z}_{p_i^{\alpha_i}}$ . Here, we assume the usual definition of direct sum of groups

262 [30]. For  $p_j^{\alpha_j} \in \{2^6, 5^3\}$  the cyclic group  $\mathbb{Z}_{p_j^{\alpha_j}}$  will cover three bases, otherwise only one base (see

263 examples below). Considering such groups (not necessarily in the order given in Eq. 1) we have:

264  $N = n_1 + \dots + n_j + n_{j+1} + \dots + n_{j+m} + \dots + n_k$ . Throughout the exposition of the theory and

265 examples given in the next sections, it will be obvious that the group representations can be extended,

266 starting from small genomic regions till cover whole chromosomes and, consequently, the whole

267 genome, i.e., the set of all chromosomes.

268 Let  $B_i$  ( $i \in I = \{1, \dots, n\}$ ) be a family of subgroups of  $G$ , subject to the following two

269 conditions:

270 1)  $\sum B_i = G$ . That is,  $B_i$  together generate  $G$ .

271 2) For every  $i \in I$  and  $i \neq j$ :  $B_i \cap \sum B_j = 0$ .

272 Then, it is said that  $G$  is the direct sum of its subgroups  $B_i$ , which formally is expressed by the  
 273 expression:  $G = \bigoplus_i B_i$  or  $G = B_1 \oplus \dots \oplus B_n$ .

274 Genomic DNA sequences from superior organisms are integrated by intergenic regions and  
 275 gene regions. The former are the larger regions, while the later includes the protein-coding regions as  
 276 subsets. The MSA of DNA and protein-coding sequences reveals allocations of the nucleotide bases  
 277 and aminoacids into stretched of *strings*. The alignment of these stretched would indicate the presence  
 278 of substitutions, insertions, and deletion (*indel*) mutations. As a result, the alignment of homolog  
 279 genomic regions or whole chromosome DNA sequences from several individuals from the same or  
 280 close-related species can be split into well-defined subregions or domains, and each one of them can  
 281 be represented as homocyclic Abelian groups, i.e., as the direct sum of cyclic group of the same  
 282 *prime-power* order (Fig 3). As a result, each DNA sequence is represented as a  $N$ -dimensional vector  
 283 with numerical coordinates representing bases and codons.

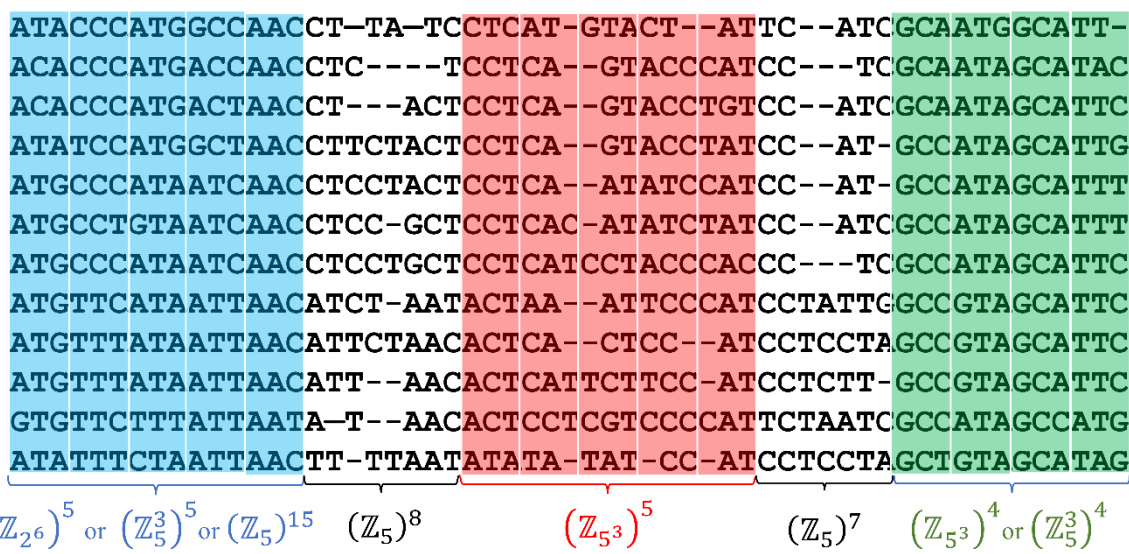

285 **Fig 3.** An illustration of a typical DNA multiple sequence alignment (MSA) including segments of  
 286 protein-coding regions. A MSA would include the presence of substitution, insertion, and deletion  
 287 mutations (*indel* mutations). The aligned sequences can be grouped into blocks, which can be  
 288 algebraically represented by Abelian groups. A homocyclic group covering a MSA block corresponds  
 289 to a sub-classification of the protein-coding region into subregions and, consequently, leading to a  
 290 more accurate molecular taxonomy of species. In protein-coding regions cyclic groups  $\mathbb{Z}_{2^6}$  and  $\mathbb{Z}_5^3$   
 291 are appropriated to study exon regions, while  $\mathbb{Z}_5$  for non-coding intron regions. As shown in section  
 292 1.4, the group representation leads us the analysis of the more frequent mutational events (represented  
 293 as endomorphisms and translations) observable in genes from organismal populations.  
 294

295 An intuitive mathematical representation of a MSA is implicit in Fig 3, with the following  
 296 observations:

297 a) Bases or codons can be represented as elements of an Abelian group defined on the set of  
 298 bases or on the set of codons. In the second block (including gap symbol ‘-’) each base from  
 299 each sequence is represented as an element from the Abelian group defined on the set  $\{A, C,$   
 300  $G, T, D\}$  where  $D = '-'$ , which is isomorphic to the Abelian  $p$ -group defined on the set  $\mathbb{Z}_5$   
 301 . The extended base triplets (including gaps symbol ‘-’) from each sequence in the third  
 302 aligned block are represented as elements from the Abelian  $p$ -group defined on the set of  
 303 extended base-triplets (125 element, see SI Table 1) which is isomorphic to the Abelian group  
 304 defined on the set  $\mathbb{Z}_{5^3}$ , and so on.

305 b) Every DNA sequence from the MSA and every subsequence on it can be represented as a  
 306 *numerical vector* with element coordinates defined in an Abelian group. For practical  
 307 computational purposes we take advantage of the group isomorphism to work with numerical  
 308 representations of DNA bases and codons. For example, codons from the first aligned block  
 309 (in blue) can be represented as elements from an Abelian group defined on the set of codons,  
 310 which can be isomorphic to  $\mathbb{Z}_{2^6}$  or to  $\mathbb{Z}_5^3$ . That is, since  $(C_g, +) \cong (\mathbb{Z}_{2^6}, +)$ , the first five  
 311 codons  $\{ATA, CCC, ATG, GCC, AAC\} \in C_g$  from the first DNA sequence from Fig 3,  
 312 can be represented by the vector of integers:  $\{48, 21, 50, 25, 1\}$  where each coordinate is an  
 313 element from group  $(\mathbb{Z}_{2^6}, +)$  (see Table 1 from reference [18]).

314 c) Any MSA can be algebraically represented as a symbolic composition of Abelian groups  
 315 each one of them is isomorphic to an Abelian group of integers module  $n$ . Such a composition  
 316 can be algebraically represented as a direct sum of homocyclic Abelian  $p$ -groups. For  
 317 example, the MSA from Fig 3 can be represented by the direct sum of five homocyclic  
 318 Abelian  $p$ -groups:

$$319 \quad G = (\mathbb{Z}_{2^6})^5 \oplus (\mathbb{Z}_5)^8 \oplus (\mathbb{Z}_{5^3})^5 \oplus (\mathbb{Z}_5)^7 \oplus (\mathbb{Z}_{5^3})^4 \quad (2)$$

320 Where the length of each region determines the number of cyclic  $p$ -groups in the  
 321 corresponding homocyclic Abelian  $p$ -group  $\mathbb{Z}_{p_i^{\alpha_i}}$  representing each region. For example, in  
 322 Eq. 2 we have the homocyclic group:  $(\mathbb{Z}_{5^3})^4 = \bigoplus_{i=1}^4 \mathbb{Z}_{5^3}$ , which is a direct sum of 4 cyclic  
 323 5-groups  $(\mathbb{Z}_{5^3}, +) \cong (C_{g^+}, +)$ . Since group  $G$  is the direct sum of homocyclic Abelian  $p$ -  
 324 groups of different prime-order, we shall say that  $G$  is a heterocyclic group.

325 In more specific scenario, the MSA from Fig 3 can be represented by only one homocyclic  
 326 Abelian 5-group:

$$327 \quad G = (\mathbb{Z}_5)^{57} \quad (3)$$

328 But this representation ignores the local variability detected by the MSA algorithm. Hence, preserving  
 329 the highlighted features, the MSA can be represented as the direct sum of homocyclic Abelian 5-  
 330 groups:

$$331 \quad G = (\mathbb{Z}_5^3)^5 \oplus (\mathbb{Z}_5)^8 \oplus (\mathbb{Z}_{5^3})^5 \oplus (\mathbb{Z}_5)^7 \oplus (\mathbb{Z}_5^3)^4 \quad (4)$$

332 Although the above *direct sums* of Abelian  $p$ -groups provides a useful compact representation  
 333 of a MSA, for application purposes to genomics, we would also consider to use the concept of direct  
 334 product (*cartesian sum or complete direct sums*) [30]. Next, let  $S$  be a set of Abelian cyclic groups  
 335 identified in a MSA  $M$  of length  $N$  (i.e., every DNA sequence from  $M$  has  $N$  bases). Let  $\ell_i$  the number  
 336 of bases or triples of bases covered on  $M$  by group  $S_i \in S$  where  $\sum_i \ell_i = N$ . Hence, each DNA  
 337 sequence on the  $M$  can be represented by a cartesian product  $(b_1, \dots, b_n)$  where  $b_i \in S_i$  ( $i = 1, \dots, n$ )  
 338 and  $n = |S|$ . Let  $\mathcal{G}_i$  be a group defined on the set of all elements  $(0, \dots, 0, b_i, 0, \dots, 0)$  where  $b_i \in S_i$   
 339 stands on the  $i^{\text{th}}$  place and 0 everywhere else. It is clear that  $S_i \cong \mathcal{G}_i$ . In this context, the set of all  
 340 vectors  $(b_1, \dots, b_n)$  with equality and addition of vectors defined coordinate-wise becomes a group ( $\mathcal{G}$ )  
 341 named direct product (cartesian sum) of groups  $S_i$  ( $\mathcal{G}_i$ ), i.e.:

342 
$$\mathcal{G} = \otimes_i S_i = \oplus_i \mathcal{G}_i \quad (5)$$

343 An illustration of the cartesian sum application was given above in observation a).

### 344 **3 Results**

345 Results essentially comprise an application of the fundamental theorem of Abelian finite groups  
346 [29,30]. By this theorem, every finite Abelian group  $G$  is isomorphic to a direct sum of cyclic groups  
347 of prime-power order of the form:

348 
$$G = \mathbb{Z}_{p_1^{\alpha_1}} \oplus \mathbb{Z}_{p_2^{\alpha_2}} \oplus \dots \oplus \mathbb{Z}_{p_n^{\alpha_n}} \quad (6)$$

349 Or (in short)  $G = \oplus_{i=1}^n \mathbb{Z}_{p_i^{\alpha_i}}$ , where the  $p_i$ 's are primes (not necessarily distinct),  $\alpha_i \in \mathbb{N}$  and  $\mathbb{Z}_{p_i^{\alpha_i}}$   
350 is the group of integer module  $p_i^{\alpha_i}$ . The Abelian group representation of the MSA from Fig 3 given  
351 by Eq. 2 correspond to a heterocyclic group that split into a direct sum of homocyclic Abelian 2-  
352 groups and 5-groups, each one of them split into the direct sum of cyclic  $p$ -groups with same order;  
353 while in Eqs. 3 and 4, the Abelian group  $G$  is decomposed into a direct sum of homocyclic Abelian  
354 5-groups [29,30].

355 Notice that for a large enough genomic region of fixed length  $N$  we can build a *manifold of (a*  
356 *set of various) heterocyclic groups*  $S_i$ , where each one of them can have different decomposition into  
357  $p$ -groups. The set  $S$  of all possible Abelian  $p$ -group representations  $S_i$  of a large genomic region of  
358 fixed length (having numerous different parts, elements, features, forms, etc.) that split into the direct  
359 sum of several heterocyclic groups  $G_k$  ( $S_i = \oplus_{k=1}^n G_k$ ) shall be called a *heterocyclic-group manifold*.  
360 So, each genomic region can be characterized by means of their corresponding *heterocyclic-group*  
361 *manifold*.

#### 362 **3.1 Examples of genomic regions group representations**

363 A group representation is particularly interesting for the analysis of DNA sequence motifs, which  
364 typically are highly conserved across the species. As suggested in Fig 3 and 4, there are subregions  
365 of DNA or protein sequences where there are few or not gaps introduced and mostly substitution



366 mutations are found. Such subregions conform blocks that can cover complete DNA sequence motifs  
 367 targeted by DNA binding proteins like transcription factors (TFs, Fig 4), which are identifiable  
 368 applying bioinformatic algorithms like BLAST [31].  
 369

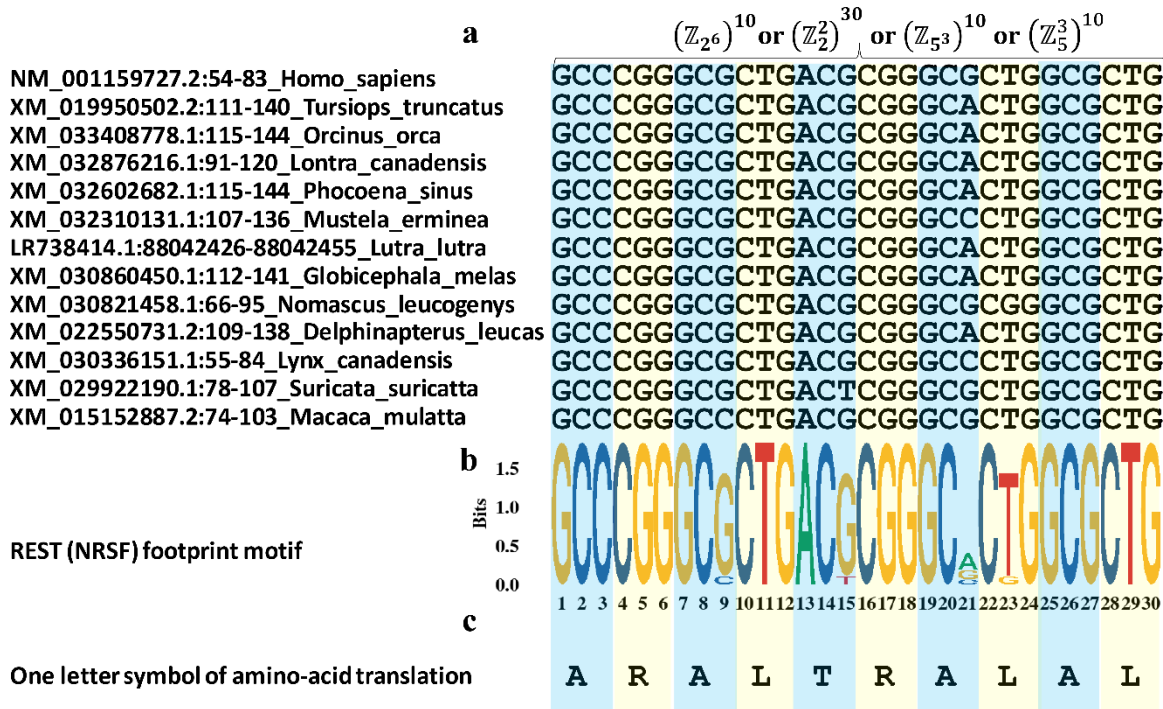

370  
 371 **Fig 4.** The DNA sequence motifs targeted by transcription factors usually integrate genomic building  
 372 block across several mammal species. **a**, DNA sequence alignment of the protein-coding sequences  
 373 from phospholipase B domain containing-2 (PLBD2) carrying the footprint sequence motif  
 374 recognized (targeted) by the Silencing Transcription factor (REST), also known as Neuron-  
 375 Restrictive Silencer Factor (NRSF) REST (NRSF). **b**, Sequence logo of the footprint motif recognized  
 376 REST (NRSF) on the exons. **c**, Translation of the codon sequences using the one-letter symbol of the  
 377 aminoacids.

378  
 379 The case of group representation on a TF binding motif is exemplified in Fig 4, where an exon  
 380 region from the enzyme *phospholipase B domain containing-2* (PLBD2) simultaneously encodes  
 381 information for several aminoacids and carries the footprint to be targeted by the transcription factor  
 382 REST. Herein, the case of double encoding called our attention, where the DNA sequence  
 383 simultaneously encodes the information for transcription enhancer target motif and for a codon  
 384 sequence (base-triplets) encoding for aminoacids. These types of double-coding regions are also  
 385 called *duons* [32–34].

386 Four group representations for this exon subregion are suggested in the top of the Fig 4 (panel  
 387 **a**). However, the MSA's sequence logo (panel **b**) suggests that this transcription factor binding-motif  
 388 is a highly conserved codon sequence in mammals (with no indel mutations on it) and, in this case,  
 389 the Abelian group  $(C_g, +) \cong (\mathbb{Z}_{2^6}, +)$  defined on the standard genetic code is the appropriated model  
 390 to represent these motifs (Fig 4). The homocyclic group representation of conserved and biological  
 391 relevant DNA sequence motifs, illustrated in Figs. 3 and 4, establish the basis for the study of the  
 392 molecular evolutionary process in the framework of group endomorphisms and automorphisms as  
 393 suggested in [18,20] (section 1.4).

394 In Fig 5, two different protein-coding (gene) models from two different genome populations  
 395 can lead to the same direct sum of Abelian  $p$ -groups and to the same final aminoacids sequence  
 396 (protein).

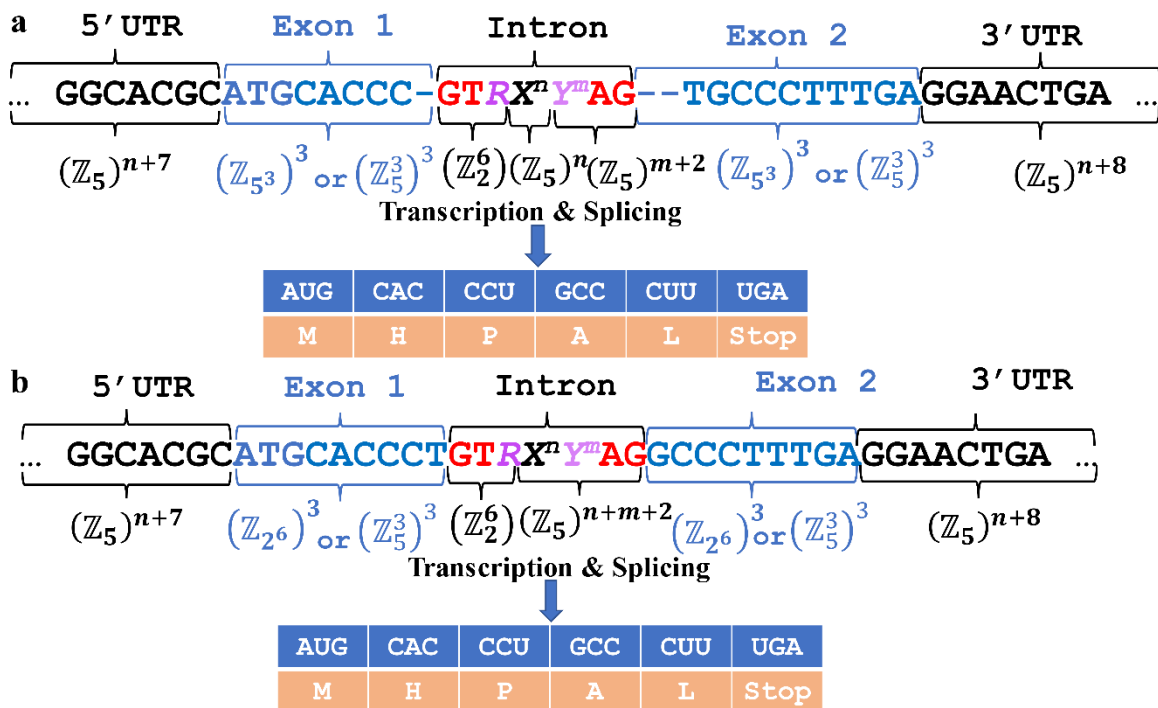

397  
 398 **Fig 5.** Two different protein-coding (gene) models can lead to the same Abelian group representation  
 399 and the same protein sequence. A dummy intron was drawn carrying the typical sequence motif  
 400 targeted by the spliceosome the donor (GUR) and acceptor ( $Y^m$ AG) sites, where  $R \in \{A, G\}$  (purines)  
 401 and  $Y \in \{C, U\}$ ,  $X$  stands for any base, and  $n$  and  $m$  indicate the number of bases present in the  
 402 corresponding sub-sequences (pyrimidines). **a**, A gene model based on a *dummy* consensus sequence  
 403 where gaps representing base D from the extended genetic code were added to preserve the coding  
 404 frame, which naturally is restored by splicing soon after transcription. **b**, A gene model where both

405 exons, 1 and 2, carries a complete set of three codons (base-triplets). Both gene models, from panels  
406 **a** and **b**, share a common group representation as direct sum of Abelian 5-groups.  
407

408 The respective exon regions have different lengths and gaps (“-”, representing base D in the  
409 extended genetic code) were added to exons 1 and 2 (from panel **a**) to preserve the reading frame in  
410 the group representation (after transcription and splicing gaps are removed). Both gene models, from  
411 panel **a** and **b**, share a common direct sum of Abelian 2-groups and 5-groups:

412  $(\mathbb{Z}_5)^{n+7} \oplus (\mathbb{Z}_5^3)^3 \oplus (\mathbb{Z}_2^6) \oplus (\mathbb{Z}_5)^{n+m+2} \oplus (\mathbb{Z}_5^3)^3 \oplus (\mathbb{Z}_5)^{n+8}$ . The analysis of these gene

413 models suggests that *DNA sequences sharing a common group representation as direct sum of*  
414 *Abelian p-groups would carry the same or similar, or close related biological information*. However,  
415 it does not imply that the architecture of these protein-coding regions is the same. The gene model in  
416 panel **b** permits the direct sum representation:

417  $(\mathbb{Z}_5)^{n+7} \oplus (\mathbb{Z}_{2^6})^3 \oplus (\mathbb{Z}_2^6) \oplus (\mathbb{Z}_5)^{n+m+2} \oplus (\mathbb{Z}_{2^6})^3 \oplus (\mathbb{Z}_5)^{n+8}$ , which is not possible for the

418 gene model from panel **a**. That is, the *heterocyclic-group manifold* from the gene model in panel **a** is  
419 different from the one in panel **b**. The difference of group representation just captures the obvious  
420 fact that these gene models are different and, consequently, their gene architectures are different.

421 At this point we shall introduce the concept of *equivalent class of genomic region*. We shall  
422 say that two genomic regions belong to same *equivalent class of genomic region* if they hold the same  
423 heterocyclic-group manifold (and, consequently, they hold same architecture). Under this definition,  
424 the region architecture of the protein-coding regions from Fig 5**a** and **b** are not equivalent. The  
425 concept of *equivalent class of genomic region* is relevant for further applications of the group  
426 representation on the taxonomy study of organismal populations.

427 Taxonomy is the study of the scientific classification of biological organisms into groups based  
428 on shared characteristics. Mathematically, this is a way to split biological organisms into classes of  
429 equivalences. Numerical taxonomy is a well-established application of multivariate statistics on the  
430 analysis of plant germplasm banks. The group representations of genomic regions will lead to a higher  
431 accuracy in the taxonomy study of organismal populations.

432 No matter how complex a genomic region might be, it has an Abelian group representation. A  
 433 further application of group theory would unveil more specific decomposition of small genomic  
 434 regions into Abelian groups. For example, the set of base-triplets found in a typical sequence motif  
 435 targeted by the spliceosome donor, GTR (Figs. 5 and 6), is in the vertical line GTZ (GUZ) of the  
 436 vertical plane  $X\bar{T}Z$  ( $XU\bar{Z}$ ) from the cube ACGU shown in Fig 2 (see also SI Fig 3).

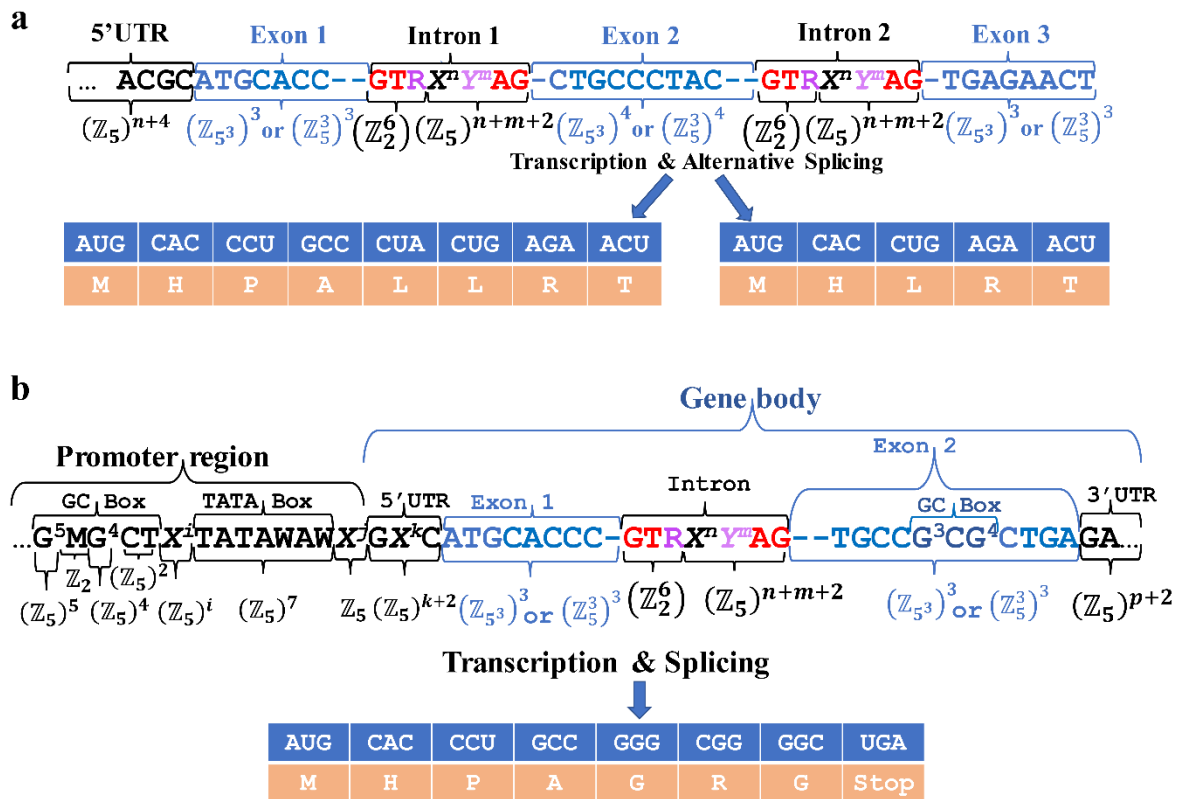

437

438 **Fig 6.** The Abelian group representation of a given genome only depend on our current knowledge  
 439 on its annotation. **a**, the alternative splicing specified for an annotated gene model does not alter the  
 440 Abelian group representation and only would add information for the decomposition of the existing  
 441 cyclic groups into subgroups. **b**, a more complex gene model including detailed information on the  
 442 promoter regions. A GC box (G5MG4CU) motif is located upstream of a TATA box (TATAWAW)  
 443 motif in the promoter region. The GC box is commonly the binding site for Zinc finger proteins,  
 444 particularly, Sp1 transcription factors. A putative GC box was included in exon 2, which is an atypical  
 445 scenario, but it can be found, e.g., in the second exon from the gene encoding for sphingosine kinase  
 446 1 (SPHK1), transcript variant 2 (NM\_182965, CCDS11744.1). In this group representation, the  
 447 spliceosome donor GTR can be represented by the elements from a quotient group (see main text).  
 448

449 Since purine bases (R: A and G) are the only accepted variants at the third codon position, it is  
 450 convenient to model these base-triplets with the group defined on the cube AGCU [11] (SI Fig 3).  
 451 Next, following analogous reasoning as in [19], it turns out that the set of base-triplets GTR is a coset

452 from the quotient group  $(C_G, +) / G_{AAG}$ , where here  $(C_G, +) \cong (\mathbb{Z}_2^6, +)$  is the additive group from  
453 the genetic code Galois field  $GF(64)$  reported in reference [35] and  $G_{AAG} = (\{AAA, AAG\}, +)$  is a  
454 subgroup from the Klein four group defined on the set  $\{AAA, AAG, AAC, AAU\}$  (see operation  
455 table in the SI Table 2), i.e.,  $GTR = GTA + G_{AAG}$  (SI Fig 3).

456 There exists strong evolutionary pressure on splicing donor site to keep the base-triplet GTR  
457 in the vertical line GTZ (GUZ) vertical line (coset). As shown in the clinical report [36] mutational  
458 variants, located in different cube's vertical lines (different cosets, SI Fig 3) GCZ and CTZ (CUZ),  
459 within intron 3 have led to four aberrant RNAs transcripts that causes rare X-chromosome-linked  
460 congenital deafness. As will be shown below (in section 3.1) the strong connection between DNA  
461 sequences and non-disrupting mutational events is mathematically (and accurately) modeled by the  
462 strong relationship between a group representation and the endomorphism ring on it.

463 An example considering changes on the gene-body reading frames as those observed in  
464 alternative splicing is shown in Fig 6. Gene-bodies with annotated alternative splicing can easily be  
465 represented by any of the groups  $(\mathbb{Z}_5^3)^n$  or  $(\mathbb{Z}_{5^3})^n$  (Fig 6a). The splicing can include enhancer  
466 regions as well (Fig 6b) [37]. Enhancers are key regulator of differential gene expression programs.

467 As commented in the introduction, cytosine DNA methylation is implicitly included in  
468 extended base-triple group representation. Typically, the analysis of methylome data is addressed to  
469 identify methylation changes induced by, for example, environmental changes, lifestyles, age, or  
470 diseases. So, in this case the letter  $D$  stands for methylated adenine and cytosine ( $D = C^m$ ), since  
471 only epigenetic changes are evaluated.

472 Concrete examples of adenine in bacteria linked to the regulation of pyelonephritis-associated  
473 pilus (pap) expression by DNA methylation on the *Escherichia coli* operon (locus X14471) and  
474 cytosine methylation in two (humans) genes from patients with pediatric acute lymphoblastic  
475 leukemia (PALL) are presented in Fig 7. On protein-coding regions methylation change can be  
476 analyzed on the homocyclic groups composed by the cyclic group  $\mathbb{Z}_5^3$  or  $\mathbb{Z}_{5^3}$  (Fig 7c and d). Notice

477 that adenine methylation is found in humans as well and, usually, it plays a very specific regulatory  
 478 role [38,39].

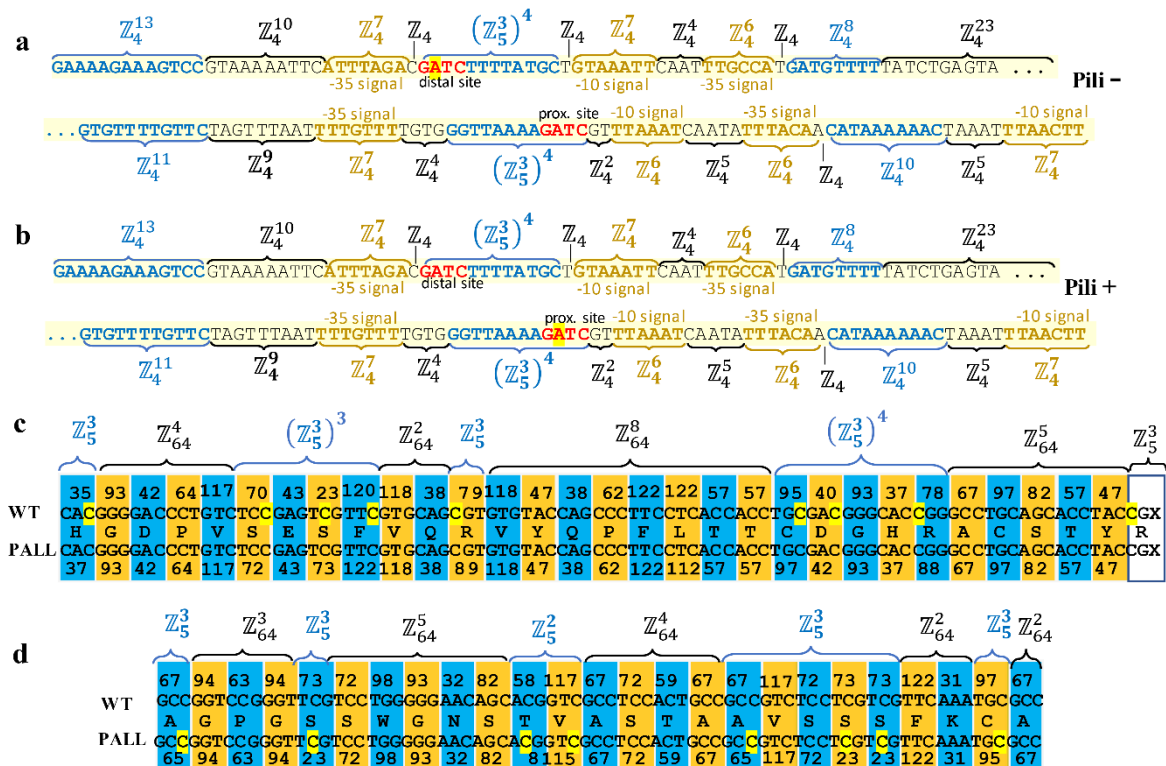

479  
 480 **Fig 7.** Vector representation of differentially methylated gene regions. **a** and **b**, regulation of  
 481 pyelonephritis-associated pilus (pap) expression by DNA methylation on the Escherichia coli operon  
 482 (locus X14471). **c** and **d**, exons regions from genes EGFL7 and P2RY1 from patients with pediatric  
 483 acute lymphoblastic leukemia (PALL). In panel **a**, two 5'-GATC-3' DNA adenine methyltransferase  
 484 (Dam) methylation sites in the middle of each set of the leucine-responsive regulatory protein (Lrp)  
 485 binding sites (in blue). In the inactive state, panel **b**, a Lrp octamer is bound to the three proximal Lrp  
 486 3' sites, while the GATC<sup>dist</sup> site in Lrp site 5 is fully methylated, and the system remains in phase  
 487 OFF (Pili -) with regard to pilus expression. In the active state, the adenine from the GATC<sup>prox</sup> is  
 488 methylated permitting to bend the DNA to recruit CRP to activate transcription of papBA genes (Pili  
 489 +). Pap pili are multisubunit fibers essential for the attachment of uropathogenic Escherichia coli to  
 490 the kidney (see [40]). In panel **c**, a segment of exon-6 from gene EGFL7 located at chromosome 9:  
 491 139,563,008-139,563,124 is shown. On average, this gene is hypo-methylated in the control group  
 492 with respect to PALL group. **d**. Segment of exon-1 from gene P2RY1. Methylated cytosines are  
 493 highlighted in yellow background. In PALL patients, gene EGFL7 mostly hypomethylated and gene  
 494 P2RY1 mostly hypermethylated in respect to healthy individuals (WT). The encoded aminoacid  
 495 sequence is given using the one letter symbols. Both genes, EGFL7 and P2RY1, were identified in  
 496 the top ranked list of differentially methylated genes integrating clusters of hubs in the protein-protein  
 497 interaction networks from PALL reported in reference [41]. The integer number at the top and bottom  
 498 of panel **c** and **d** stand for the codon coordinates in  $Z_{s^3}$  (see SI Table 1).

499  
 500 It is obvious that the MSA from a whole genome derives from the MSA of every genomic  
 501 region, from the same or closed related species. At this point, it is worthy to recall that there is not,

502 for example, just one human genome or just one from any other species, but populations of human  
 503 genomes and genomes populations from other species. Since every genomic region can be represented  
 504 by the direct sum of Abelian homocyclic groups of prime-power order, then the whole genome  
 505 population from individuals from the same or closed related species can be represented as an Abelian  
 506 group, which will be, in turns, the direct sum of Abelian homocyclic groups of prime-power order.  
 507 Hence, results lead us to the representation of genomic regions from organismal populations from the  
 508 same species or close related species (as suggested in Fig 3 to 7) by means of direct sum of their  
 509 group representation into Abelian cyclic groups. A general illustration of this modelling would be,  
 510 for example:

$$511 \quad G = (\mathbb{Z}_{5^3})^{n_1} \oplus \overbrace{(\mathbb{Z}_{2^6})^{m_1}}^{\text{motif}} \oplus (\mathbb{Z}_{5^3})^{n_2} \oplus \dots \oplus \overbrace{(\mathbb{Z}_2^2)^{m_2}}^{\text{domain}} \oplus \dots \oplus \overbrace{(\mathbb{Z}_{5^3})^{n_p}}^{\text{domain}} \oplus \overbrace{(\mathbb{Z}_{2^6})^{m_p}}^{\text{motif}} \quad (7)$$

512 That is, Eq. 7 expresses that any large enough genomic region can be represented as direct sum of  
 513 homocyclic Abelian groups of prime-power order. In other words, the fundamental theorem of  
 514 Abelian finite groups (FTAG) has an equivalent in genomics.

515 **Theorem 1.** The genomic architecture from a genome population can be quantitatively represented  
 516 as an Abelian group isomorphic to a direct sum of homocyclic Abelian groups of prime-power order.

517 The proof of this theorem is self-evident across the discussion and examples presented here.  
 518 Basically, group representations of the genetic code lead to group representations of local genomic  
 519 domains in terms of cyclic groups of prime-power order, for example,  $(C_g, +) \cong (\mathbb{Z}_{2^6}, +)$ ,  
 520  $(C_{G^+}, +) \cong (\mathbb{Z}_5^3, +)$  or  $(C_{g^+}, +) \cong (\mathbb{Z}_{5^3}, +)$ , till covering the whole genome. As for any finite Abelian  
 521 group, the Abelian group representation of genome populations can be expressed in terms of a direct  
 522 sum of Abelian homocyclic groups of prime-power order. Any new discovering on the annotation of  
 523 a given genome population will only split an Abelian group, already defined on some genomic  
 524 domain/region, into the direct sum of Abelian subgroups ■.

525 The application of the FTAG in terms of the group representation of genomic regions  $G$ , as  
 526 given in Eq. 7, establishes the basis to the study the molecular evolutionary process in terms of

527 endomorphisms. That is, fixed mutational events in the organismal population can be modeled as  
528 homomorphism: endomorphisms and automorphisms, all elements of the endomorphism ring  $\mathfrak{R}(G)$   
529 on  $G$  (see next section). In the context of comparative evolutionary genomics, the analysis of the  
530 endomorphism ring  $\mathfrak{R}(G)$  is an intermediate step for the further application of methods from  
531 Category theory, which has the potential to unveil unsuspected features of the genome architecture,  
532 hard to be inferred from the direct experimentation.

### 533 3.2 The endomorphism ring

534 A biologically relevant application of the theory presented here relies on the fact that if a finite group  
535  $G$  is written as a direct sum of subgroups  $G_i$ , as given in Eq. 7, then endomorphism ring  $End(G)$  is  
536 isomorphic to the ring matrices  $(A_{ij})$ , where  $A_{ij} \in Homo(G_i, G_j)$  (homomorphism between  $G_i$  and  
537  $G_j$ ), with the usual matrix operations [30]. In the case of genomic regions from the species or closed  
538 related genomic regions from distinct species, the endomorphism that transform the DNA aligned  
539 sequence  $\alpha$  into  $\beta$  ( $\alpha, \beta \in G$ ) is represented by a matrix with only non-zero elements in the principal  
540 diagonal. These diagonal elements are sub-matrices  $A_{ii} \in End(G_i)$  or  $A_{ii} \in Aut(G_i)$ . In other  
541 words, mutational events fixed in gene/genome populations can be quantitatively described as  
542 endomorphisms and automorphisms.

543 In the Abelian  $p$ -group defined on  $\mathbb{Z}_{p_i^{\alpha_i}}$ , the endomorphisms  $\eta_i \in End\left(\mathbb{Z}_{p_i^{\alpha_i}}\right)$  are described  
544 as functions  $f(x) = kx \pmod{p_i^{\alpha_i}}$ , where  $k$  and  $x$  are elements from the set of integers modulo  $p_i^{\alpha_i}$ .  
545 For example, in the cube ACGT the sequence ATACCCATGGCCAAC (blue block in Fig. 3)  
546 represented by the vector  $(48, 21, 50, 25, 1) \in \left(\mathbb{Z}_{2^6}\right)^5$  is transformed into the sequence



547 ACACCCATGACCAAC, represented by the vector  $(16, 21, 50, 17, 1) \in \mathbb{Z}_{2^6}$ , by the automorphism:

$$548 \begin{bmatrix} 3 & 0 & 0 & 0 & 0 \\ 0 & 1 & 0 & 0 & 0 \\ 0 & 0 & 1 & 0 & 0 \\ 0 & 0 & 0 & 57 & 0 \\ 0 & 0 & 0 & 0 & 1 \end{bmatrix}, \text{ i.e.: } (48, 21, 50, 25, 1) \begin{bmatrix} 3 & 0 & 0 & 0 & 0 \\ 0 & 1 & 0 & 0 & 0 \\ 0 & 0 & 1 & 0 & 0 \\ 0 & 0 & 0 & 57 & 0 \\ 0 & 0 & 0 & 0 & 1 \end{bmatrix} \text{ mod } 64 = \begin{pmatrix} 16 \\ 21 \\ 50 \\ 17 \\ 1 \end{pmatrix}.$$

549 Now, it is not difficult to realize that the set of all endomorphisms  $\eta_i \in \text{End}\left(\mathbb{Z}_{p_i^{\alpha_i}}\right)$  hold the ring  
 550 axioms mentioned in the Introduction. That is, the set of all endomorphisms  $\eta_i \in \text{End}\left(\mathbb{Z}_{p_i^{\alpha_i}}\right)$  forms  
 551 a ring on  $\mathbb{Z}_{p_i^{\alpha_i}}$  that we shall denote as  $\mathfrak{R}\left(\mathbb{Z}_{p_i^{\alpha_i}}\right)$ .

552 As shown in reference [30], if  $G = G_1 \oplus G_2 \dots \oplus G_n$  is a direct decomposition with fully invariant  
 553 summands, then :

$$554 \text{End}(G) = \text{End}(G_1) \oplus \text{End}(G_2) \dots \oplus \text{End}(G_n) \quad (8)$$

555 In this modeling, mutational events are represented as endomorphisms  $\eta_i \in \text{End}\left(\mathbb{Z}_{p_i^{\alpha_i}}\right)$  on  $\mathbb{Z}_{p_i^{\alpha_i}}$   
 556 . This fact permits the study of the genome architecture through the study of the evolutionary  
 557 (mutational) process in a genome population. Moreover, the decomposition of the endomorphism ring  
 558 into subgroups, quotient groups, and cosets can lead to a deterministic algebraic taxonomy of the  
 559 species based on their genome architecture, which is not limited by our current biological knowledge.

560 Particularly relevant for the evolutionary comparative genomics is Baer-Kaplansky theorem: *If G*  
 561 *and H are p-groups such that*  $\mathfrak{R}(G) \cong \mathfrak{R}(H)$ , *then*  $G \cong H$  ([29,42]). That is, two Abelian finite  
 562 groups are isomorphic if, and only if, their endomorphism rings are isomorphic [42]. In other words,  
 563 genomic regions experiencing mutational events representable by isomorphic rings are algebraically  
 564 represented by isomorphic Abelian groups and, consequently, have similar genome architecture.

565 Application of Baer-Kaplansky theorem implies that two gene-body regions encoding exactly for  
 566 the same polypeptide but with different region architecture (Fig 5) are under different evolutionary  
 567 pressure. That is, if the group representations of two gene-body regions are not isomorphic, then their

568 endomorphism rings are not isomorphic either and, consequently, they will be under different  
569 evolutionary pressure, experiencing different subsets of mutational events, which are represented as  
570 endomorphisms from their corresponding endomorphism ring. This scenario is typically found in  
571 some isoforms, which are proteins that are similar to each other and perform similar roles within cells  
572 [43]. This is the case where two or more closely related genes are responsible for the same translated  
573 protein, illustrated in Fig 5. They can be simply duplicated, or paralogous genes, where both paralogs  
574 can remain similar (paralog isoforms) if an increased production of the protein is advantageous or if  
575 a dosage balance occurs in conjunction with other gene products or where different transcripts can  
576 lead to different subcellular localization [44].

577 A screening of mutational events on subsets of aligned genes suggests that the decomposition  
578 of protein-coding regions is tractable, conforming Eq. 8. Results with the alignments of several  
579 protein-coding regions are shown in Fig 8. In this example, we searched for automorphisms on the  
580 *groups of dual cubes* [11]: ACGT – TGCA and CATG – GTAC on  $\mathbb{Z}_{2^6}$ , which comprise four of the  
581 24 possible algebraic representations of the standard genetic code [17] isomorphic to  $\mathbb{Z}_{2^6}$ .

582 The analysis of the frequency of mutational events (automorphisms, COVID: human vs bat  
583 strains) by mutation types is shown in Fig 8a. Results are consistent with the well-known observation  
584 highlighted by Crick: *the highest mutational rate is found in the third base of the codon, followed by*  
585 *the first base, and the lowest rate is found in the second one* [45]. However, estimations on different  
586 gene sets suggest that the evolutionary pressure on each codon position depends on the  
587 physicochemical properties (annotated according to IUPAC nomenclature [36]) of DNA bases. For  
588 example, in Fig 8a pyrimidine (Y) transitions on the third codon position (HHY) are, by far, the most  
589 frequent observed mutational events. While, in BRCA1 gene (SI Fig 2), the frequency of purine  
590 (HHR) transitions is followed by pyrimidine (HHY) transitions.

591 The analysis on the pairwise alignment of protein-coding regions of SARS and Bat SARS-like  
592 coronaviruses is presented in Fig 8b and c. Most of the mutational events distinguishing human SARS  
593 from Bat SARS-like coronaviruses can be described by automorphism on cube ACGT. This  
594 observation was confirmed in primate somatic cytochrome c (Fig 8c) and BRCA1 DNA repair gene

595 (Fig 8d). Since automorphisms transform the null element (gap-triplet DDD/---) into itself, insertion-  
 596 deletion mutational events cannot be described by automorphisms but as translations on the groups  
 597 (denoted as *Trnl* in Fig 8). The representation of conserved genomic regions with homocyclic *p*-group  
 598 is straightforward. However, their frequency in the genome architecture exponentially decreases with  
 599 the size of the region (Fig 8f and SI Fig 4).

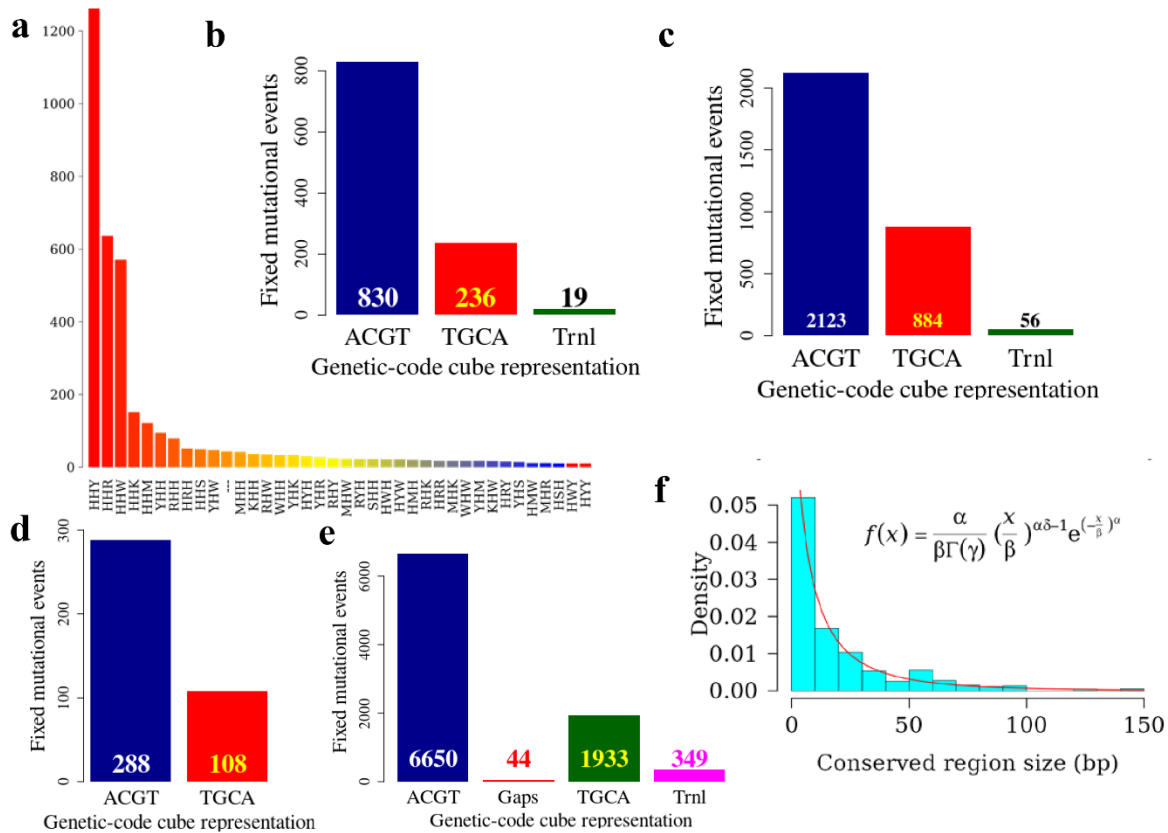

600

601 **Fig 8.** Analysis of mutational events in terms of automorphisms on DNA protein-coding regions  
 602 represented as homocyclic groups on  $\mathbb{Z}_{64}$ . In the Abelian group defined on  $\mathbb{Z}_{64}$ , automorphisms are  
 603 described as functions  $f(x) = kx \pmod{64}$ , where  $k$  and  $x$  are elements from the set of integers modulo  
 604 64. **a**, Frequency of mutational events (automorphisms) according to their mutation type. That is,  
 605 every single base mutational event across the MSA was classified according IUPAC nomenclature  
 606 [46]: 1) According to the number of hydrogen bonds (on DNA/RNA double helix): strong  $S = \{C, G\}$   
 607 (three hydrogen bonds) and weak  $W = \{A, U\}$  (two hydrogen bonds). According to the chemical type:  
 608 purines  $R = \{A, G\}$  and pyrimidines  $Y = \{C, U\}$ . 3). According to the presence of amino or keto groups  
 609 on the base rings: amino  $M = \{C, A\}$  and keto  $K = \{G, T\}$ . Constant (hold) base positions were labeled  
 610 with letter H. So, codon positions labeled as HKH means that the first and third bases remains constant  
 611 and mutational events between bases G and T were found in the MSA. **b** and **c**, Bar plots showing the  
 612 frequency of automorphisms found on the *group of dual cubes* (see [11]): ACGT – TGCA and CATG  
 613 – GTAC on  $\mathbb{Z}_{64}$  between SARS coronavirus GZ02 and bat SARS-like coronaviruses: **a**, isolate  
 614 Rs7327 (GenBank: KY417151.1, protein-coding regions) and **c**, isolate bat-SL-CoVZC45 (GenBank:  
 615 MG772933.1:265-1345513455-21542, nonstructural polyprotein). **d**, frequency of automorphisms  
 616 between human somatic cytochrome c and other nine primates (monkeys). **e**, frequency of  
 617 automorphisms between human BRCA1 DNA repair gene and other seven primates (see Material and

618 Method section). **f**, Distribution of the conserved COVID-19 genomic regions according to their size.  
619 The graphics result from the analysis SARS coronavirus GZ02 versus the two mentioned bat strains.  
620 The best fitted probability distribution turned out to be the generalized gamma distribution.  
621

622 Next, under the assumption that Eq. 8 holds, different protein-coding regions must experience  
623 “*preference*” for specific type of automorphisms. To illustrating the concept, an analysis based on the  
624 application of Theorem 1 and Eq. 8 on gene/genome population studies, an application of decision  
625 tree algorithms was conducted on primate BRCA1 genes. Results for the analysis with Chi-squared  
626 Automated Interaction Detection (CHAID) is presented in Fig 9. It is important to keep in mind that  
627 this is only an illustrative example with small sample size, and that definite conclusions related to  
628 BRCA1 genes can only be derived with larger sample size from humans and non-human primate  
629 sequences. In this algorithmic approach, for each compound category consisting of three or more of  
630 the original categories, the algorithm finds the most significant binary split for a node (split-variable)  
631 based on a chi-squared test [47].

632 For a given MSA of protein-coding regions, the resulting decision tree leads to stochastic-  
633 deterministic logical rules (propositions) permitting a probabilistic estimation of the best model  
634 approach holding Eq. 8. For example, since only one mutational event human-to-human from class  
635 A3 is reported in the right side of the tree (Fig 9), with high probability the proposition: “ $(A4 \vee (A3$   
636  $\wedge \neg HRH)) \rightarrow \neg \text{human}$ ” is true. That is, with high probability only non-humans hold the last rule.  
637 Due to graphic printing limitations not all tree details are shown in Fig 9 (calculations details are  
638 given in the tutorials links provided at SI).

639 Results shown in Fig 9 are only for the purpose to illustrate the application of the theory, since  
640 for the sake of visualization and simplicity, were limited to small sample data set and to the  
641 application of a relatively “modest” (unsupervised) machine-learning approach which, however, is  
642 sufficient to illustrate the concepts. Next, let us suppose that the decision tree from Fig 9 holds on a  
643 large enough sample-size (to minimize the classification error) of primate BRCA1-gene populations.  
644 Then, with high probability the logical rule: “ $A1 \wedge R3 \wedge (YHH \vee HHY) \rightarrow \text{human}$ ” is true. That is,  
645 with high probability transitions mutations ( $T \leftrightarrow C$ ) on region R3 from BRCA1 gene (specifically at

646 positions 323 and 333, Fig 9) in the first and third codon positions, represented by automorphisms  
 647 with coefficient between 0 and 15, are not observed in primates other than humans.

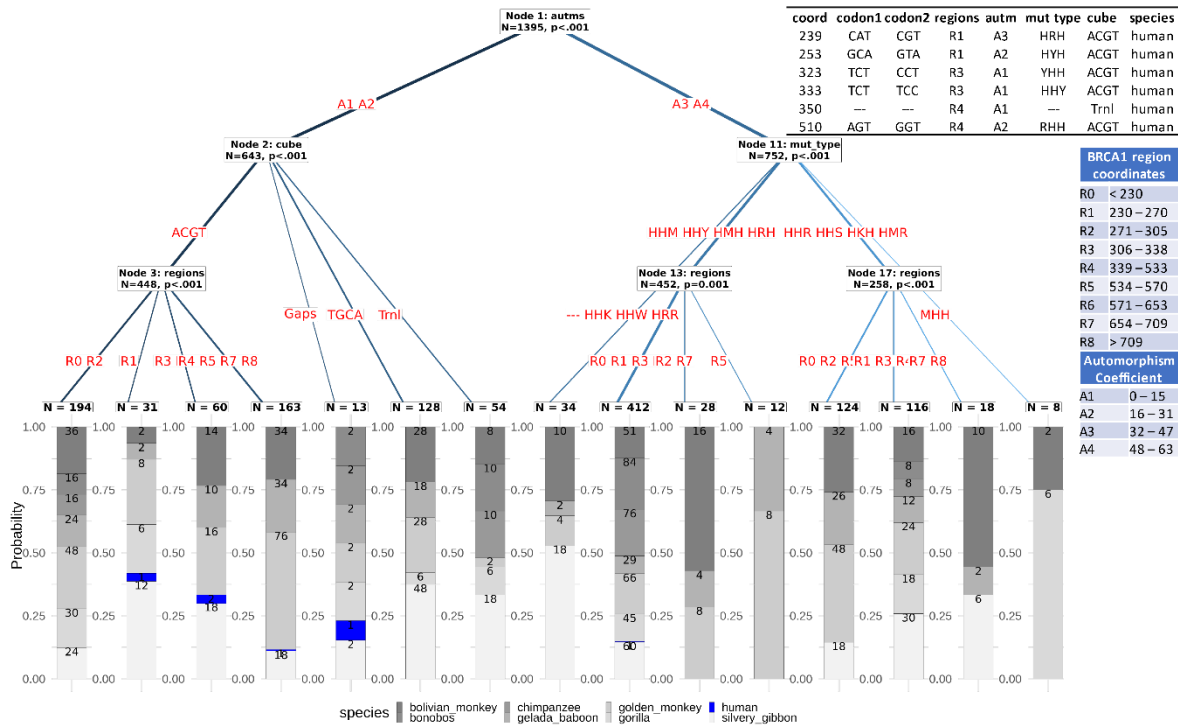

648  
 649 **Fig 9.** Decision tree based on automorphisms estimated on primate BRCA1 genes. Symbols R0 to  
 650 R8 denote the protein regions as given in UniProt plus inter regions segments (see  
 651 [https://www.uniprot.org/uniprot/P38398#family\\_and\\_domains](https://www.uniprot.org/uniprot/P38398#family_and_domains)). Only regions experiencing fixed  
 652 mutational events are included in the analysis. The range of automorphism coefficients  $k$  ( $f(x) = kx$   
 653  $\text{mod } 64$ ) are denoted after the isomorphism between the genetic-code cyclic group defined in the set  
 654 of codons and the Abelian group defined on  $\mathbb{Z}_{64}$ . For the sake of graphic comprehension, the  
 655 coordinates of human-to-human mutations were added. Every branch (path) from the top to the leaf  
 656 node is equivalent to a stochastic-determinist logical rule defining the automorphism preference for  
 657 each protein region in the subset of analyzed primate BRCA1 genes. For example, with high  
 658 probability the rule: “ $(A4 \vee (A3 \wedge \neg R1)) \rightarrow \neg \text{human}$ ” is true (see Supporting Information).  
 659

660 Obviously, the predictive power of the stochastic rules depends on the size of the samples from  
 661 the populations under scrutiny. A larger data set including 41 variants of the BRCA1 gene and a rough  
 662 estimation of the (encoded) *mutational cost* given in the term of a quasischemical energy of aminoacid  
 663 interactions in an average buried environment [11,48] (data included in the GenomAutomorphism R  
 664 package [28]) allow reach more robust rules after the application of decision tree algorithms.  
 665 Likewise, an estimation of *mutational cost* can be given in terms of distances between aminoacids  
 666 based on codon distances defined on a specific genetic-code cube model or on a combination of two  
 667 models [11,49]. Examples of stochastic some mutational rules are given in Table 1.

668

669 **Table 1.** Examples of stochastic mutational rules found in aligned DNA sequences from primate  
670 BRCA1 genes.

| Mutational cost (MC)                                                  | Stochastic Rule <sup>3</sup>                                                            |
|-----------------------------------------------------------------------|-----------------------------------------------------------------------------------------|
| Aminoacid contact potential <sup>1</sup>                              | MC(0.03) $\rightarrow \neg$ human                                                       |
|                                                                       | MC(-0.47) $\wedge$ R4 $\wedge$ A4 $\rightarrow$ human                                   |
|                                                                       | MC(-0.47) $\wedge$ (R0 $\vee$ R0. $\vee$ R3 $\vee$ R5) $\rightarrow$ bonobos            |
|                                                                       | MC(0.08) $\rightarrow$ bolivian monkey                                                  |
| Aminoacid distance based on genetic-code codon distances <sup>2</sup> | MC(1.34) $\wedge$ R0 $\rightarrow \neg$ human                                           |
|                                                                       | MC(1.36) $\rightarrow$ gorilla                                                          |
|                                                                       | MC(0.28) $\wedge$ R4 $\wedge$ A4 $\rightarrow$ human                                    |
|                                                                       | (MC(0.12) $\vee$ MC(0.12)) $\wedge$ (R1 $\vee$ R5) $\rightarrow$ silvery gibbon         |
|                                                                       | MC(0.26) $\wedge$ (A1 $\vee$ A2) $\wedge \neg$ R4 $\wedge \neg$ HHW $\rightarrow$ human |
|                                                                       | MC(0.99) $\wedge$ HHS $\wedge$ (R7 $\vee$ R4) $\rightarrow$ golden monkey               |

671 <sup>1</sup>Aminoacid contact potentials are given in reference [48]. <sup>2</sup>Aminoacid distance based on the codon distance are given in  
672 reference [49] and applied (together with the concept of encoded mutational cost) in reference [11]. <sup>3</sup> The decision trees  
673 using CHAID algorithm are given in the Supporting Information (also available in the tutorials at  
674 <https://genomaths.github.io/genomautomorphism>).  
675

676 Our results provides supporting evidence to the previous finding reported in [11] about that the  
677 selection of the genetic-code cube model cannot be arbitrary, since the automorphisms and the  
678 estimation of mutational costs (as defined in [11]) on different local DNA protein-coding regions  
679 shows clear “preference” for specific models. Obviously, the mathematical model is only a tool (a  
680 representation of the physicochemical relationships given between molecules) applied to uncovering  
681 the existence of specific evolutionary constraints.

### 682 3.3 Future theoretical developments

683 In this section we want to highlight a direction of future theoretical development. A full coverage of  
684 this topic is out of the limits of the current work. Nevertheless, a sketch on a future direction is  
685 presented here. Our goal will be the description of mutational process on protein-coding regions in  
686 terms of homomorphisms of different algebraic structures.

687 Genomic regions represented as an Abelian group decomposable into homocyclic Abelian  $p$ -  
688 groups, e.g.  $\mathbb{Z}_{2^6} \oplus \dots \oplus \mathbb{Z}_{2^6}$ ,  <sup>$n$  times</sup> can be studied as  $R$ -algebras [18], which in particular is a  $R$ -module  
689 and after considering only the sum operation of the ring  $\mathbb{Z}_{2^6}$ , it is also a  $G$ -module. Recall that our  
690 modeling just takes advantage of the group isomorphism:  $(\mathbb{Z}_{64}, +) \cong (C_g, +)$  (for the sake of

691 simplicity we are using the same sum operation symbol in both groups,  $\mathbb{Z}_{64}$  and  $C_g$ ). Thus, the  $\mathbb{Z}_{64}$ -  
 692 algebra of the group  $S = \left( (C_g)^n, + \right) = (C_g, +) \oplus \dots \oplus (C_g, +)$  over the ring  $\mathbb{Z}_{64}$  can be defined  
 693 [18].

694 In our current case (considering the codon coordinate level), we are interested on heterocycle  
 695 groups  $S = \bigoplus G_i$  of  $C_g$  and  $C_{g+}$  ( $G_i \in \{C_g, C_{g+}\}$ ), as suggested in Fig. 1, which permits the analysis  
 696 of multiple sequence alignments including insertion-deletion (indel) mutations. It is not hard to notice  
 697 that the collection of all the  $R$ -Module of groups  $S$  over the ring  $R = \bigotimes R_i$ , ( $R_i \in \{\mathbb{Z}_{64}, \mathbb{Z}_{125}\}$ ) together  
 698 with  $R$ -Module homomorphisms conform to a category of  **$R$ -Modules**, also denoted as  **$R$ -Mod**. Let  
 699  $\mathcal{C}_N$  be the category **Ab** with the Abelian groups of the DNA sequences of length  $\leq N$  as objects and  
 700 group homomorphisms as morphisms (see Appendix A). Frey's theorem states that every Abelian  
 701 category is a subcategory of some category of modules over a ring [50]. Mitchell has reinforced  
 702 Frey's result, proving that every Abelian category is a full subcategory of a category of modules  
 703 over a ring [51].

704 At codon coordinate level, the group defined on the set of codon is a subgroup of the group  
 705 defined on the set of extended base-triplets ( $C_g \subset C_{g+}$ ) and the  $\mathbb{Z}_{125}$ -Module of group  $C_g$  is a  
 706 submodule of the  $\mathbb{Z}_{125}$ -Module of group  $C_{g+}$  over the ring  $\mathbb{Z}_{125}$ . The triplet of gaps '---' corresponds  
 707 to the identity element of group  $C_{g+}$ , which is mapped into  $0 \in \mathbb{Z}_{5^3}$  by  $Hom(C_{g+}, \mathbb{Z}_{5^3})$ . A  
 708 homomorphism always maps the identity element from the domain of group, say  $\mathbf{0}_{C_g}$ , into the identity  
 709 element from the codomain  $\mathbf{0}_{C_{g+}}$ , which in  $C_{g+}$  is  $0_{C_{g+}} = '---'$ .

710 The following example illustrates a possible sequence of attainable analytical steps with  
 711 concrete computational biology application. Let  $A = \text{GACAGAGCAGTATTAGCTTCACAC}$  and  $B$   
 712  $= \text{GAAAACGTATTATCAAAG}$  DNA sequence segments represented as elements from the groups:  
 713  $G_A = C_g^{\text{ACGT}} \oplus C_g^{\text{TGCA}} \oplus (C_g^{\text{ACGT}})^6$  and  $G_B = C_g^{\text{ACGT}} \oplus C_g^{\text{TGCA}} \oplus (C_g^{\text{ACGT}})^4$ , respectively, where  $C_g^X$   
 714 is the Abelian  $p$ -group defined on the set of 64 codons and base orders (cubes):  $X = \{\text{ACGT}, \text{TGCA}\}$ .

715 Groups  $G_A$  and  $G_B$  are elements of the **Ab** category  $\mathcal{C}_N$  defined on the collection of heterocyclic  
 716 group  $(C_g^X)^N$  defined on the set of DNA sequences (of codons) with length  $N \leq 8$ .

717 Since the triplet of gaps cannot be arbitrary allocated in the sequence, the alignment of DNA  
 718 sequence is an essential step required for the application of this modeling preserving the biological  
 719 meaning. The pairwise alignment of the corresponding aminoacid sequences from  $A$  and  $B$  yields:

720  $\begin{matrix} \text{DRAVLASQ} \\ \text{EN-VL-SN} \end{matrix}$ , which corresponds to the DNA sequence alignment:  $aln$   
 721  $= \begin{pmatrix} \text{GACAGAGCAGTATTAGCTTCACAC} \\ \text{GAAAAC---GTATTA---TCAAAG} \end{pmatrix}$ . That is, to preserve the reading frame, a robust alignment is  
 722 accomplished translating the codon sequence into aminoacid sequence alignment.

723 Sequences  $A$  and  $B' = \text{GAAAAC---GTATTA---TCAAAG}$  can also be represented as elements  
 724 from group:

$$725 \quad G_{A'} = C_g^{\text{ACGT}} \oplus C_g^{\text{TGCA}} \oplus C_{g^+}^{\text{ACGT}} \oplus (C_g^{\text{ACGT}})^2 \oplus C_{g^+}^{\text{ACGT}} \oplus (C_g^{\text{ACGT}})^2$$

726 This group is an element of the **Ab** category  $\mathcal{C}_{A'}$ , which is a subcategory of the  $\mathbf{R}_{A'}\text{-Mod}$  category  
 727 over the ring  $R_{A'} = (\mathbb{Z}_{2^6})^2 \otimes \mathbb{Z}_{5^3} \otimes (\mathbb{Z}_{2^6})^2 \otimes \mathbb{Z}_{5^3} \otimes (\mathbb{Z}_{2^6})^2$ . The group isomorphism  $F_B : G_B \rightarrow G_{B'}$   
 728 is the functor that maps DNA sequences from group  $G_B \in \mathcal{C}_N$  into an element from group  $G_{B'} \in \mathcal{C}_R$   
 729 (see Appendix B). That is, for all element  $b = (X_1, X_2, X_3, X_4, X_5, X_6)$  ( $b \in G_B$ ) there is a unique  
 730 element  $b' = (X'_1, X'_2, 0, X'_3, X'_4, 0, X'_5, X'_6)$  ( $X'_i = X_i$  and  $b' \in G_{B'}$ ).

731 Also, there is an injective morphism  $F_A : G_A \rightarrow G_{A'}$  that transforms each element  
 732  $a = (X_1, X_2, X_3, X_4, X_5, X_6, X_7, X_8)$  ( $a \in G_A$ ) into a unique element  
 733  $a' = (X'_1, X'_2, X'_3, X'_4, X'_5, X'_6, X'_7, X'_8)$  ( $a' \in G_{A'}$ ), which is evident since  $C_g \subset C_{g^+}$  and,  
 734 consequently, codons are preserved, i.e.,  $X'_i = X_i$  and  $G_A$  is isomorphic to the image  $F_A(G_A)$ . The  
 735 homomorphism  $F_{A'} : G_A \rightarrow G_{A'}$  is also a functor which maps elements from the  $\mathbf{R}_A\text{-Mod}$  category  
 736 over the ring  $R_A = \otimes_8 \mathbb{Z}_{2^6}$  into the  $\mathbf{R}_{A'}\text{-Mod}$  category. Notice that  $F_B(B)$  is a subgroup of  $F_A(A)$ .



737 In practice, for the sake of computational genomics implementations, the aligned DNA  
 738 sequences  $A$  and  $B$  can be represented by the numerical vectors  $a = (9,32,24,56,60,27,28,5)$  and  
 739  $b = (8,1,56,60,28,1)$ , respectively, with coordinates on  $\mathbb{Z}_{2^6}$ . The application of the morphisms  $F_A$   
 740 and  $F_B$  permits the new representations:  $a' = ((9,32) \in \mathbb{Z}_{2^6}, 66 \in \mathbb{Z}_{5^3}, (56,60) \in \mathbb{Z}_{2^6}, 69 \in$   
 741  $\mathbb{Z}_{5^3}, (28,5) \in \mathbb{Z}_{2^6})$  and  $b' = ((8,1) \in \mathbb{Z}_{2^6}, 0 \in \mathbb{Z}_{5^3}, (56,60) \in \mathbb{Z}_{2^6}, 0 \in \mathbb{Z}_{5^3}, (28,1) \in \mathbb{Z}_{2^6}),$   
 742 respectively. The group homomorphism  $\varphi$  with matrix representation with diagonal elements  
 743  $((8,2) \in \mathbb{Z}_{2^6}, 0 \in \mathbb{Z}_{5^3}, (1,1) \in \mathbb{Z}_{2^6}, 0 \in \mathbb{Z}_{5^3}, (1,1) \in \mathbb{Z}_{2^6})$  maps sequence  $a'$  into  $b'$ , i.e.,  $\varphi(a') = b'$   
 744 :

$$745 \quad (9, 32, 66, 56, 60, 69, 28, 5) \begin{bmatrix} 8 & 0 & 0 & 0 & 0 & 0 & 0 & 0 \\ 0 & 2 & 0 & 0 & 0 & 0 & 0 & 0 \\ 0 & 0 & 0 & 0 & 0 & 0 & 0 & 0 \\ 0 & 0 & 0 & 1 & 0 & 0 & 0 & 0 \\ 0 & 0 & 0 & 0 & 1 & 0 & 0 & 0 \\ 0 & 0 & 0 & 0 & 0 & 0 & 0 & 0 \\ 0 & 0 & 0 & 0 & 0 & 0 & 1 & 0 \\ 0 & 0 & 0 & 0 & 0 & 0 & 0 & 13 \end{bmatrix} = \begin{pmatrix} 8 \\ 1 \\ 0 \\ 56 \\ 60 \\ 0 \\ 28 \\ 1 \end{pmatrix}$$

746 Where the third and sixth rows are computed modulo 125 and the rest modulo 64. The group  
 747 homomorphism  $h: G_{B'} \rightarrow G_A$  that accomplish the mapping  $h(b') = a'$  is computed as:

$$748 \quad (8, 1, 0, 56, 60, 0, 28, 1) \begin{bmatrix} 58 & 0 & 0 & 0 & 0 & 0 & 0 & 0 \\ 0 & 32 & 66 & 0 & 0 & 0 & 0 & 0 \\ 0 & 0 & 0 & 0 & 0 & 0 & 0 & 0 \\ 0 & 0 & 0 & 1 & 0 & 0 & 0 & 0 \\ 0 & 0 & 0 & 0 & 1 & 0 & 0 & 0 \\ 0 & 0 & 0 & 0 & 0 & 0 & 0 & 0 \\ 0 & 0 & 0 & 0 & 0 & 0 & 1 & 0 \\ 57 & 0 & 0 & 0 & 0 & 69 & 0 & 5 \end{bmatrix} = \begin{pmatrix} 9 \\ 32 \\ 66 \\ 56 \\ 60 \\ 69 \\ 28 \\ 5 \end{pmatrix}$$

749 Or by means of the affine transformation:

$$750 \quad \left( (8, 1, 0, 56, 60, 0, 28, 1) \begin{bmatrix} 58 & 0 & 0 & 0 & 0 & 0 & 0 & 0 \\ 0 & 32 & 0 & 0 & 0 & 0 & 0 & 0 \\ 0 & 0 & 0 & 0 & 0 & 0 & 0 & 0 \\ 0 & 0 & 0 & 1 & 0 & 0 & 0 & 0 \\ 0 & 0 & 0 & 0 & 1 & 0 & 0 & 0 \\ 0 & 0 & 0 & 0 & 0 & 0 & 0 & 0 \\ 0 & 0 & 0 & 0 & 0 & 0 & 1 & 0 \\ 0 & 0 & 0 & 0 & 0 & 0 & 0 & 5 \end{bmatrix} \right) \text{mod } 64 + \begin{pmatrix} 118 \\ 0 \\ 66 \\ 0 \\ 0 \\ 69 \\ 0 \\ 0 \end{pmatrix} \text{mod } 125 = \begin{pmatrix} 9 \\ 32 \\ 66 \\ 56 \\ 60 \\ 69 \\ 28 \\ 5 \end{pmatrix}$$

751 In summary, a future theoretical development in the framework of category theory opens new  
752 horizons for the analysis of the mutational process in a wider computational genomic scenario not  
753 previously studies in molecular evolutionary biology.

#### 754 **4 Discussions**

755 The encoding of the physicochemical relationships between nucleotides (nitrogenous bases) in the  
756 DNA double helix in terms of group operations permits a mathematical representation of genome  
757 architecture interpretable in a molecular evolutionary context. The group representations of the  
758 genetic code are logically extended from protein-coding DNA regions to the entire genome. As shown  
759 in Fig 1, the Abelian group representation of genomic regions into the direct sum of Abelian  $p$ -group  
760 is only one of several steps addressed to get better understanding on how genomes are built.

761 The advantage on using group representations is that there exists a well-established  
762 mathematical development that leads to an objective study of the genome architecture in a molecular  
763 evolutionary context, through the analysis of mutational events in terms of group homomorphisms:  
764 endomorphisms, automorphisms, and translations. On this scenario the analysis of group  
765 homomorphisms permits us the uncovering of stochastic rules constraining the local architecture on  
766 genes and genomic regions. The goal is unveiling hidden genomic architecture and rules hard to be  
767 detected by current experimental approaches. All the information required can be retrieved from the  
768 MSA of DNA sequences, which is particularly relevant for poorly annotated genomes.

769 Examples shown in Figs 3 to 4 indicates that whatever would be the genomic architecture for  
770 given species, the observed variations in the individual populations and in populations from closed  
771 related species, it can be quantitatively described as the direct sum of Abelian cyclic groups. The  
772 discovering/annotation of new genomic features will only lead to the decomposition of previous  
773 known Abelian homocyclic or cyclic groups representing a genomic subregion into direct sums of  
774 subgroups. In such algebraic representation DNA sequence motifs for which only substitution  
775 mutations happened are specifically represented by the Abelian group  $(C_g, +) \cong (\mathbb{Z}_{64}, +)$ , in protein

776 coding regions, and by any combination of groups  $(\mathfrak{B}, +) \cong (\mathbb{Z}_2^2, +)$ ,  $(\mathfrak{B}^2, +) \cong (\mathbb{Z}_2^4, +)$  or some  
777 quotient group like  $C_G/G_{\text{GGA}} \cong (\mathbb{Z}_2, +)$  in non-protein coding regions.

778 Notably, the genetic code Abelian group  $(C_{G_+}, +) \cong (\mathbb{Z}_5^3, +)$  is enough for an algebraic  
779 representation of the genome population from the same species or close related species. However,  
780 such a decomposition leads to a poor description of local architecture that, as suggested in Figs. 3 to  
781 6, can mask relevant biological features. Figure 3 to 6 illustrate the basic Abelian group  
782 representations for further analysis of genome architecture through the study of the mutational events,  
783 as essential transformations inherent to the molecular evolutionary process, in terms of  
784 endomorphisms and automorphisms, elements of the endomorphism ring.

785 For the sake of reader's comprehension, the examples on the group representation of genomic  
786 regions presented here are simple. However, the analysis demands for the development of novel  
787 computational algebraic approaches to study the genomic architecture. Unlike to traditional  
788 computational algebra, we can take advantage of the group isomorphisms, which permits decreasing  
789 the computational complexity by avoiding symbolic computation. Nevertheless, results presented  
790 here show that the architecture of genome region in an entire population can be quantitatively studied  
791 in the framework of Abelian group theory.

792 From several examples provided here, it is clear that there exists a language for the genome  
793 architecture unveiled when represented it in terms of sums of finite Abelian groups, which can be  
794 further studied with the application of methods from category theory, the potential success of which  
795 has been proven in programming languages and in linguistic [52]. The future developments of  
796 genome annotation from several species can certainly lead to the discovery of logical rules from such  
797 a language, finding the viable variations in the populations. The identification of quotient groups (at  
798 larger scale) can permit the stratification of large genome population into equivalence classes  
799 (quotient subgroups) corresponding to individual subpopulations, each one of them carrying  
800 particular viable variations of species genome architecture.

801 As indicated in reference [18], natural genomic rearrangement like DNA recombination and  
802 translocation at structural and functional domain can be represented as group automorphisms and  
803 endomorphisms. Biologically, such description corresponds to the fact that the new genetic  
804 information is recreated, simply, by way of reorganization of the genetic material in the chromosomes  
805 of living organisms [5,53]. The analysis and discussion on the application of the endomorphism ring  
806 theory to describe the dynamics of genome population is a promising subject for further studies.

807 Particularly promising is the application of the genomic Abelian groups on epigenomic studies,  
808 which results from the model where base  $D$  stands for the methylated cytosine and adenine. As  
809 suggested in Fig 7a and b, a precise decomposition of methylation motif into the direct sum of Abelian  
810 finite groups can lead to their classification into unambiguous equivalence classes. The group  
811 structure of the methylation regulatory regions: **GATCTTTTATGC** and **GGTTAAAAGATC**, both  
812 represented by the homocyclic group on  $(\mathbb{Z}_5^3)^4$ , breaks from the monotone homocyclic group  
813 representation of the region in terms of cyclic groups on  $\mathbb{Z}_4$  (Fig 7a and b). The group representation  
814 of protein-coding regions (or base-triplet sequences) as numerical vectors with coordinates on  $\mathbb{Z}_{5^3}$   
815 (Fig 7c and d) facilitates the analysis of methylation changes represented as group  
816 endomorphism/automorphisms of the cyclic group on  $\mathbb{Z}_{5^3}$ .

817 Results indicate that, as a consequence of the genetic code constraints and the evolutionary  
818 pressure on protein-coding regions, stochastic-deterministic logical rules can be inferred on a large  
819 enough sample-size from a gene/genomic-region population. Such a stochastic-deterministic rules  
820 lead to specific applications of Theorem 1 and Eq.8, consequently, the analysis of mutational process  
821 on each group, subgroup, and coset. For example, mutational events on a MSA column (identified)  
822 from class YHH (with discriminatory classification power as shown in Fig 8) where the second and  
823 third DNA bases remain invariant (H) and the first base are pyrimidines (Y) experiencing transition  
824 mutations (across individuals sequences) are represented by automorphisms on a subgroup (from the  
825 genetic code Abelian subgroup  $(C_G, +)$ ) defined on the set {THH, CHH} isomorphic to  $(\mathbb{Z}_2, +)$  [20].

826 Figure 9 provides illustrative example that motivates further applications of based machine-  
827 learning bioinformatic approaches to unveil the subjacent logic to the genome architecture and its  
828 association with the DNA cytosine/adenine methylation patterning found on individual populations  
829 and the changes (re patterning) induced by, e.g., environmental changes, aging process and diseases,  
830 which is of particular interest in genomic medicine [54]. Machine learning applications on MSA  
831 involving large sample size of genomic regions from populations of different species can unveil  
832 further decompositions into the direct sum of Abelian groups, which do not depend on our current  
833 knowledge of the annotated genomes. As suggested in Fig 9, we can expect that most of the hiding  
834 genomic DNA sequence motif can be unveiled by studying the molecular evolutionary (mutational)  
835 process in a genome population through the lens of the endomorphism ring. In other words, as a  
836 consequence of the injective relationship:  $DNA\ sequence \rightarrow 3D\ chromatin\ architecture$  [3,4,6], fixed  
837 mutational events (in organismal populations) on DNA sequence motifs involved in the 3D chromatin  
838 architecture are under evolutionary pressure, biophysically and biochemically constrained to preserve  
839 the chromatin biological functions.

840 Results shown in Figs. 8 and 9 also suggest deep implications of Baer-Kaplansky theorem on  
841 the genome architecture unknown by the current knowledge and understanding of genome annotation,  
842 which currently relies on the DNA sequence itself. Concretely, on an evolutionary context, the fact  
843 that two genomic regions from two different species are almost identical and, event would encode for  
844 the same functional protein, does not necessarily imply that they hold to the same genome  
845 architecture. The evolutionary pressure in both such hypothetical regions must be same, which  
846 implies that the regions experience the same type of mutational events in terms of  
847 automorphism/endomorphism representations.

848 For example, let's suppose that the results shown in Fig 9 were derived from a large sample  
849 size (large enough to derive statistically significant rules), then the rule " $A1 \wedge R3 \wedge (YHH \vee HHY)$   
850  $\rightarrow human$ " (Fig 9) implies that the gene regions of BRCA1 from human and non-human primates do  
851 not belong to the same equivalent class of genomic region. In particular, since the endomorphism  
852 rings  $\mathfrak{R}(G_{human}^{BRCA1})$  and  $\mathfrak{R}(G_{non-human}^{BRCA1})$  on the Abelian groups  $G_{human}^{BRCA1}$  and  $G_{non-human}^{BRCA1}$  defined on the

853 human and non-human primates BRCA1 genes, respectively, are not isomorphic, then according to  
854 the Baer-Kaplansky theorem groups  $G_{human}^{BRCA1}$  and  $G_{non-human}^{BRCA1}$  are also not isomorphic. Hence, region  
855 architectures of BRCA1 gene in human and non-human primates are (in this hypothetical scenario)  
856 implicitly different, which is not obvious to human eyes from their MSA (see supporting information).

857 Results presented here would have considerable positive impact on current molecular  
858 evolutionary biology, which heavily relies on subjective evolutionary null hypotheses about the past.  
859 As suggested in reference [11], the genomic Abelian groups open new horizons for the study of the  
860 molecular evolutionary stochastic processes (at genomic scale) with relevant biomedical applications,  
861 founded on a deterministic ground, which only depends on the physicochemical properties of DNA  
862 bases and aminoacids. In this scenario, the only molecular evolutionary hypothesis needed about the  
863 past is a fact, the existence of the genetic code.

864 Remarkably, further studies applying the theory presented here do not require for special  
865 experimental datasets but for the DNA sequences of the genomic regions under scrutiny. Although  
866 the accuracy of the predictions depends on the sample size, the number of sequenced genomes stored  
867 in the databases grows year-after-year. Large samples of DNA sequences (from homolog genomic  
868 regions) from at least two or more species facilitate application of Baer-Kaplansky theorem and  
869 further studies applying methods of Categorical theory to unveil the grammar embedded in the DNA  
870 sequences.

871 The theory and concretes examples provided here make explicit the basic foundation for a  
872 further unprecedented application of the last advances in Abelian group theory incorporating methods  
873 from Category theory, where groups and group homomorphisms (in our context: mutational events)  
874 are the main players, which have the potential to discover unsuspected features of the genome  
875 architecture, opening new horizon to the genomic taxonomy of species in accordance with the state-  
876 of-the-art in mathematics, logic, and computational sciences. In other words, these applications have  
877 the potential to elevate the genomic studies from the current descriptive level to the vanguard level  
878 marked in the frontier of science by mathematics, physics, and computational sciences.

## 879 **5 Conclusions**

880 Results to date indicate that the genetic code and the physicochemical properties of DNA bases on  
881 which the genetic code algebraic structure are defined, has a deterministic effect, or at least partially  
882 rules on the current genome architectures, in such a way that the Abelian group representations of the  
883 genetic code are logically extended to the whole genome. In consequence, the fundamental theorem  
884 of Abelian finite groups can be applied starting from genomic regions till cover whole chromosomes.  
885 This result opens new horizons for further genomics studies with the application of the Abelian group  
886 theory, which currently is well developed and well documented [30,55].

887 Results suggest that the architecture of current population genomes is quite far from  
888 randomness and obeys stochastic-deterministic rules. The nexus between the Abelian finite group  
889 decomposition into homocycle Abelian  $p$ -groups and the endomorphism ring paved the ways to  
890 unveil unsuspected stochastic-deterministic logical propositions ruling the ensemble of genomic  
891 regions and sets the basis for a novel algebraic taxonomy of the species, which is not limited by our  
892 current biological knowledge.

893 In the context of evolutionary comparative genomics, the theory presented here open new  
894 horizons for the application of Group theory including methods of Category theory, which have the  
895 potential to unveil hidden features and rules inherent to the genome architecture, leading to an  
896 unprecedented understanding on how genomes are built.

897 We believe that the mathematical formalism proposed here sets the theoretical ground for a  
898 further development in genomics, transitioning the field from a fully empirical science to a predictive  
899 science, where the theoretical and empirical research coexist in a tight positive feedback loop, a  
900 development stage only reached so far in the field of physics.

901 All the above claims are feasible, only limited by our computational power and the availability  
902 of samples of sequenced genomes from the same species and from multiple species.

903 At this point we emphasize that *an accurate understanding of the genome architecture and*  
904 *population's structure, on a formal mathematical framework, is as essential for the future of genetic*

905 *engineering and genome editing as the physics of architecture is to the design of sturdy and stable*  
906 *energy-efficient building.*

## 907 **6 Appendix A. Genetic code algebraic structures defined on the base and** 908 **codon sets**

909 An Abelian group structure  $(B, +)$  is a set  $B$  together with a binary operation '+' that combines any  
910 two elements  $a \in B$  and  $b \in B$  to form another element of  $c \in B$ , denoted  $a + b = c$ , which satisfy  
911 the following axioms:

- 912 1) Associativity. For all  $a, b, c \in B$ , the equality  $(a + b) + c = a + (b + c)$  holds.
- 913 2) Identity. There exists an element  $e \in B$  named identity element of  $B$ , such that for any  
914  $a \in B$ , the equality  $a + e = a$  holds.
- 915 3) Commutativity. For all  $a, b \in B$ , the equality  $a + b = b + a$

916 The Abelian groups considered here are finite cyclic groups  $(G, +)$  isomorphic to the Abelian  
917 group defined on the set of integers modulo  $n$ , denoted as  $\mathbb{Z}_n (\mathbb{Z} / n\mathbb{Z})$ . That is, the integers  
918  $1, 2, 3, \dots, n - 1$  form a cyclic group of order  $n$  under addition (modulo  $n$ ) and 0 as the identity element.  
919 This group will be denoted as  $(\mathbb{Z}_n, +)$ . However, for the sake of simplicity in the figures it will be  
920 denoted simply as  $\mathbb{Z}_n$ , i.e., without making distinction between the set  $\mathbb{Z}_n$  and group structure  
921 defined on it. The particular interest for the current work is the Abelian  $p$ -group derived when  $n = p^\alpha$   
922 where  $p$  is a prime number and  $\alpha$  an integer. The group operations defined on the set of bases or on  
923 the codon set are associated to physicochemical properties of DNA bases (see the next sections).

924

### 925 ***Homomorphisms and isomorphisms***

926 In modern algebra, a group homomorphism is a map  $f : A \rightarrow B$  between two group structures  $(A, \bullet)$   
927 and  $(B, \circ)$  such that for all  $a, b \in A$  holds:  $f(\alpha_1 \bullet \alpha_2) = f(\alpha_1) \circ f(\alpha_2) = \beta_1 \circ \beta_2$ , where



928  $\beta_1, \beta_2 \in B$ . A group isomorphism is a one-to-one correspondence (mapping) between two sets that  
929 preserves binary relationships between elements of the sets. That is, an isomorphism is a  
930 homomorphism holding the inverse mapping:  $f^{-1}(\beta_1 \circ \beta_2) = f^{-1}(\beta_1) \cdot f^{-1}(\beta_2) = \alpha_1 \cdot \alpha_2$ . For  
931 example, since there exists only one cyclic group with four elements up to isomorphism, for each one  
932 of the 24 cyclic group  $(\mathfrak{B}, +_b)$  defined on the set of bases  $\mathfrak{B} = \{A, C, G, T\}$  ([17,18]) there exists a  
933 one-to-one mapping  $f$  such that for each base  $\beta \in \mathfrak{B}$  there is an integer  $\iota \in \mathbb{Z}_4$  such that  $f(\beta) = \iota$   
934 and:

935 1.  $f(\beta_1 +_b \beta_2) = f(\beta_1) + f(\beta_2) = \iota_1 + \iota_2$ ,  $\beta_1, \beta_2 \in \mathfrak{B}$  and  $\iota_1, \iota_2 \in \mathbb{Z}_4$ .

936 2. The inverse mapping  $f^{-1}(\iota_1 + \iota_2) = f^{-1}(\iota_1) +_b f^{-1}(\iota_2) = \beta_1 +_b \beta_2$

937 To highlight the fact that the sum operations are defined on different ways on the sets  $\mathfrak{B}$  and  $\mathbb{Z}_4$ , we  
938 have used the symbols ‘ $+_b$ ’ and ‘ $+$ ’, respectively. However, for sake of brevity of the symbolic  
939 notation, such knowledge will be considered implicit, writing simply ‘ $+$ ’. Then, we said that groups  
940  $(\mathfrak{B}, +_b)$  and  $(\mathbb{Z}_4, +)$  are isomorphic; in symbols  $(\mathfrak{B}, +_b) \cong (\mathbb{Z}_4, +)$ .  $f$  and its inverse  $f^{-1}$  are  
941 called isomorphisms. If  $f$  (and its inverse  $f^{-1}$ ) is a mapping from a group into itself, then  $f$  is called  
942 an automorphism. A mapping  $g$ , not necessarily one-to-one, of the elements from a group into itself  
943 is called a group endomorphism. An endomorphism that is also an isomorphism is an automorphism.

944 A ring algebraic structure is obtained when together with the sum operation “ $+$ ” (as defined  
945 above) a new operation “ $\cdot$ ” is defined on the set  $B$  holding the properties:

946 1. Associativity:  $(a \cdot b) \cdot c = a \cdot (b \cdot c)$  for all  $a, b, c \in B$

947 2. Multiplication is distributive with respect to addition:

948 a.  $(a + b) \cdot c = (a \cdot c) + (b \cdot c)$  for all  $a, b, c \in B$  (right distributivity).

949 b.  $c \cdot (a + b) = c \cdot a + c \cdot b$  for all  $a, b, c \in B$  (left distributivity).

950 As it is shown in the next section, these algebraic structures have been defined on the genetic code.

951 In particular, the ring  $(\mathbb{Z}_{2^6}, +, \cdot)$  and endomorphism ring (section 3.1) has been defined and studied

952 on the genetic code [18].

### 953 **Appendix B. Category**

954 Category theory is a general mathematical theory of structures and of systems of structures that

955 occupy a central position in contemporary mathematics, theoretical computer science, and linguistics

956 [56].

957 **Definition:** A category  $\mathcal{C}$  can be described as a collection of objects  $\mathcal{O}$  satisfying the

958 following three conditions:

959 1) *Morphism:* For every pair  $X, Y$  of objects, there is a set  $Hom(X, Y)$  called the

960 *morphisms* from  $X$  to  $Y$  in  $\mathcal{C}$ . If  $f$  is a morphism from, we write  $f: X \rightarrow Y$ .

961 2) *Identity:* For every object  $X$ , there exists a morphism  $id_X$  in  $Hom(X, X)$ , called the

962 *identity* on  $X$  (also denoted as  $1_X$ ).

963 3) *Composition:* For every triple  $X, Y$ , and  $Z$  of objects, there exists a partial binary

964 operation from  $Hom(X, Y) \times Hom(Y, Z)$  to  $Hom(X, Z)$ , called the composition of

965 morphisms in  $\mathcal{C}$ . If  $f: X \rightarrow Y$  and  $g: Y \rightarrow Z$ , this composition is written as the

966 mapping  $(g \circ f): X \rightarrow Z$ .

967 Identity, morphisms, and composition satisfy two axioms:

968 *Associativity:* If  $f: X \rightarrow Y$ ,  $g: Y \rightarrow Z$ , and  $h: Z \rightarrow W$ , then  $h \circ (g \circ f) = (h \circ g) \circ f$ .

969 *Identity:* If  $f: X \rightarrow Y$ , then  $f_X \circ f = f$  and  $f \circ f_X = f$ .

970

971 **Definition:** A functor  $F$  is a function between two categories  $\mathcal{C}$  and  $\mathcal{D}$  which maps objects to

972 objects and morphisms to morphisms. That is:

973 • For each  $X \in \mathcal{C}$  there is an object  $F(X) \in \mathcal{D}$

- 974 • For each morphism  $f: X \rightarrow Y$  in  $\mathcal{C}$  there is morphism  $F(f): F(X) \rightarrow F(Y)$  in  $D$  such  
975 that the following conditions hold:
- 976 i.  $F(g \circ f) = F(g) \circ F(f)$  for all morphisms  $f: X \rightarrow Y$  and  $g: X \rightarrow Y$  in  $\mathcal{C}$
- 977 ii.  $F(id_X) = id_{F(X)}$  for all  $X \in \mathcal{C}$ .

## 978 7 Supporting Information

979 A summary with the reported genetic code Abelian groups relevant for the current study is provided  
980 as supporting information in a file named: *Supporting\_Information.docx*.

981 All the data, computational and statistical analyses can be reproduced following the R scripts  
982 provided in tutorials available at the GenomAutomorphism R package website  
983 <https://genomaths.github.io/genomautomorphism/>. In particular, data and R scripts used in the  
984 computation of automorphisms and the decision tree from Fig 9 are available within  
985 GenomAutomorphism R package and in a tutorial at:

986 [https://genomaths.github.io/genomautomorphism/articles/automorphism\\_and\\_decision\\_tree.html](https://genomaths.github.io/genomautomorphism/articles/automorphism_and_decision_tree.html).

## 987 8 References

- 988 [1] E. V. Koonin, Evolution of genome architecture, *Int. J. Biochem. Cell Biol.* 41 (2009) 298–  
989 306. <https://doi.org/10.1016/j.biocel.2008.09.015>.
- 990 [2] S. Whalen, R.M. Truty, K.S. Pollard, Enhancer-promoter interactions are encoded by complex  
991 genomic signatures on looping chromatin, *Nat. Genet.* 48 (2016) 488–496.  
992 <https://doi.org/10.1038/ng.3539>.
- 993 [3] J. Nuebler, G. Fudenberg, M. Imakaev, N. Abdennur, L.A. Mirny, Chromatin organization by  
994 an interplay of loop extrusion and compartmental segregation, *Proc. Natl. Acad. Sci. U. S. A.*  
995 115 (2018) E6697–E6706. <https://doi.org/10.1073/pnas.1717730115>.
- 996 [4] M.J. Rowley, V.G. Corces, Organizational principles of 3D genome architecture, *Nat. Rev.*  
997 *Genet.* 19 (2018) 789–800. <https://doi.org/10.1038/s41576-018-0060-8>.
- 998 [5] A. Piazza, W.D. Heyer, Homologous Recombination and the Formation of Complex Genomic  
999 Rearrangements, *Trends Cell Biol.* 29 (2019) 135–149.  
1000 <https://doi.org/10.1016/j.tcb.2018.10.006>.
- 1001 [6] H. Zheng, W. Xie, The role of 3D genome organization in development and cell  
1002 differentiation, *Nat. Rev. Mol. Cell Biol.* 20 (2019) 535–550. <https://doi.org/10.1038/s41580->

- 1003 019-0132-4.
- 1004 [7] T.D. Schneider, Evolution of biological information, *Nucleic Acids Res.* 28 (2000) 2794–9.  
1005 [http://www.pubmedcentral.nih.gov/articlerender.fcgi?artid=102656&tool=pmcentrez&rende](http://www.pubmedcentral.nih.gov/articlerender.fcgi?artid=102656&tool=pmcentrez&rendertype=abstract)  
1006 [rtype=abstract](http://www.pubmedcentral.nih.gov/articlerender.fcgi?artid=102656&tool=pmcentrez&rendertype=abstract).
- 1007 [8] H.P. Yockey, Origin of life on earth and Shannon’s theory of communication, *Comput. Chem.*  
1008 24 (2000) 105–123. [https://doi.org/10.1016/S0097-8485\(99\)00050-9](https://doi.org/10.1016/S0097-8485(99)00050-9).
- 1009 [9] R. Sanchez, R. Grau, A genetic code Boolean structure. II. The genetic information system as  
1010 a Boolean information system, *Bull. Math. Biol.* 67 (2005) 1017–1029.  
1011 <https://doi.org/10.1016/j.bulm.2004.12.004>.
- 1012 [10] R. Sanchez, S.A. Mackenzie, Information thermodynamics of cytosine DNA methylation,  
1013 *PLoS One.* 11 (2016) e0150427. <https://doi.org/10.1371/journal.pone.0150427>.
- 1014 [11] R. Sanchez, Symmetric Group of the Genetic-Code Cubes. Effect of the Genetic-Code  
1015 Architecture on the Evolutionary Process, *MATCH Commun. Math. Comput. Chem.* 79  
1016 (2018) 527–560. [http://match.pmf.kg.ac.rs/electronic\\_versions/Match79/n3/match79n3\\_527-](http://match.pmf.kg.ac.rs/electronic_versions/Match79/n3/match79n3_527-560.pdf)  
1017 [560.pdf](http://match.pmf.kg.ac.rs/electronic_versions/Match79/n3/match79n3_527-560.pdf).
- 1018 [12] R. Sánchez, E. Morgado, R. Grau, A genetic code Boolean structure. I. The meaning of  
1019 Boolean deductions, *Bull. Math. Biol.* 67 (2005) 1–14.  
1020 <https://doi.org/10.1016/j.bulm.2004.05.005>.
- 1021 [13] H.P. Yockey, Information theory, evolution and the origin of life, *Inf. Sci. (Ny).* 141 (2002)  
1022 219–225. [https://doi.org/10.1016/S0020-0255\(02\)00173-1](https://doi.org/10.1016/S0020-0255(02)00173-1).
- 1023 [14] R. Sanchez, R. Grau, A genetic code Boolean structure. II. The genetic information system as  
1024 a Boolean information system, *Bull. Math. Biol.* 67 (2005) 1017–1029.  
1025 <https://doi.org/10.1016/j.bulm.2004.12.004>.
- 1026 [15] D.. Andrews, M.L. Boss, DNA code may transmit “Superinformation,” *Yale Sci. Mag.* 45  
1027 (1971) 50–51.
- 1028 [16] G.S. Chirikjian, Algebraic and Geometric Coding Theory, in: *Stoch. Model. Inf. Theory, Lie*  
1029 *Groups, Vol. 2 Anal. Methods Mod. Appl.*, Birkhäuser Boston, Boston, 2012: pp. 313–336.  
1030 [https://doi.org/10.1007/978-0-8176-4944-9\\_9](https://doi.org/10.1007/978-0-8176-4944-9_9).
- 1031 [17] M. V José, E.R. Morgado, R. Sánchez, T. Govezensky, The 24 Possible Algebraic  
1032 Representations of the Standard Genetic Code in Six or in Three Dimensions, *Adv. Stud. Biol.*  
1033 4 (2012) 119–152. [http://www.m-hikari.com/asb/asb2012/asb1-4-2012/joseASB1-4-2012-](http://www.m-hikari.com/asb/asb2012/asb1-4-2012/joseASB1-4-2012-1.pdf)  
1034 [1.pdf](http://www.m-hikari.com/asb/asb2012/asb1-4-2012/joseASB1-4-2012-1.pdf).
- 1035 [18] R. Sanchez, E. Morgado, R. Grau, Gene algebra from a genetic code algebraic structure, *J.*  
1036 *Math. Biol.* 51 (2005) 431–457. <https://doi.org/10.1007/s00285-005-0332-8>.
- 1037 [19] R. Sanchez, R. Grau, E. Morgado, A novel Lie algebra of the genetic code over the Galois  
1038 field of four DNA bases, *Math. Biosci.* 202 (2006) 156–174.

- 1039 <https://doi.org/10.1016/j.mbs.2006.03.017>.
- 1040 [20] R. Sánchez, R. Grau, An algebraic hypothesis about the primeval genetic code architecture,  
1041 *Math. Biosci.* 221 (2009) 60–76. [https://doi.org/S0025-5564\(09\)00114-X](https://doi.org/S0025-5564(09)00114-X) [pii]  
1042 10.1016/j.mbs.2009.07.001.
- 1043 [21] D. Andrew, M.L. Boss, DNA code may transmit “Superinformation,” *Chem. Eng. News* 48  
1044 (1970) 50–51.
- 1045 [22] H.J. Danckwerts, D. Neubert, Symmetries of genetic code-doublings, *J Mol Evol* . 5 (1975)  
1046 327–332. <https://doi.org/10.1007/BF01732219>.
- 1047 [23] M.O. Bertman, J.R. Jungck, Group graph of the genetic code, *J. Hered.* 70 (1979) 379–384.  
1048 <https://doi.org/10.1093/oxfordjournals.jhered.a109281>.
- 1049 [24] J.E.M. Hornos, Y.M.M. Hornos, Algebraic model for the evolution of the genetic code, *Phys.*  
1050 *Rev. Lett.* 71 (1993) 4401–4404. <https://doi.org/10.1103/PhysRevLett.71.4401>.
- 1051 [25] J.E.M. Hornos, Y.M.M. Hornos, M. Forger, Symmetry and Symmetry Breaking: an Algebraic  
1052 Approach To the Genetic Code, *Int. J. Mod. Phys. B.* 13 (1999) 2795–2885.  
1053 <https://doi.org/10.1142/S021797929900268X>.
- 1054 [26] M. Forger, S. Sachse, Lie superalgebras and the multiplet structure of the genetic code. I.  
1055 Codon representations, *J. Math. Phys.* 41 (2000) 5407–5422.  
1056 <https://doi.org/10.1063/1.533417>.
- 1057 [27] K. Tamura, M. Nei, Estimation of the number of nucleotide substitutions in the control region  
1058 of mitochondrial DNA in humans and chimpanzees, *Mol. Biol. Evol.* 10 (1993) 512–26.  
1059 <http://www.ncbi.nlm.nih.gov/pubmed/8336541>.
- 1060 [28] R. Sanchez, GenomAutomorphism: Compute the automorphisms between DNA’s Abelian  
1061 group representations. R package version 1.0.0, (2020).  
1062 <https://doi.org/10.18129/B9.bioc.GenomAutomorphism>.
- 1063 [29] L. Fuchs, Abelian groups, Publishing House of the Hungarian Academy of Sciences, 1958.
- 1064 [30] L. Fuchs, Infinite Abelian Groups - Volume I, 1st Editio, Academic Press, 1970.  
1065 <https://doi.org/10.1007/978-3-319-19422-6>.
- 1066 [31] M. Yang, M.K. Derbyshire, R.A. Yamashita, A. Marchler-Bauer, NCBI’s Conserved Domain  
1067 Database and Tools for Protein Domain Analysis, *Curr. Protoc. Bioinforma.* 69 (2020) 1–25.  
1068 <https://doi.org/10.1002/cpbi.90>.
- 1069 [32] A.B. Stergachis, E. Haugen, A. Shafer, W. Fu, B. Vernot, A. Reynolds, A. Raubitschek, S.  
1070 Ziegler, E.M. LeProust, J.M. Akey, J.A. Stamatoyannopoulos, Exonic transcription factor  
1071 binding directs codon choice and affects protein evolution., *Science* (80-. ). 342 (2013) 1367–  
1072 72. <https://doi.org/10.1126/science.1243490>.
- 1073 [33] I. Reyna-Llorens, S.J. Burgess, G. Reeves, P. Singh, S.R. Stevenson, B.P. Williams, S.  
1074 Stanley, J.M. Hibberd, Ancient duons may underpin spatial patterning of gene expression in

- 1075 C 4 leaves, Proc. Natl. Acad. Sci. U. S. A. 115 (2018) 1931–1936.  
1076 <https://doi.org/10.1073/pnas.1720576115>.
- 1077 [34] V.K. Yadav, K.S. Smith, C. Flinders, S.M. Mumenthaler, S. De, Significance of duon  
1078 mutations in cancer genomes, Sci. Rep. 6 (2016) 1–9. <https://doi.org/10.1038/srep27437>.
- 1079 [35] R. Sanchez, R. Grau, E.R. Morgado, R. Sánchez, L.A. Perfetti, R. Grau, E.R.M. Morales, A  
1080 New DNA Sequence Vector Space on a Genetic Code Galois Field, MATCH Commun. Math.  
1081 Comput. Chem. 54 (2005) 3–28.  
1082 [http://match.pmf.kg.ac.rs/electronic\\_versions/Match54/n1/match54n1\\_3-28.pdf](http://match.pmf.kg.ac.rs/electronic_versions/Match54/n1/match54n1_3-28.pdf).
- 1083 [36] Y. Lv, J. Gu, H. Qiu, H. Li, Z. Zhang, S. Yin, Y. Mao, L. Kong, B. Liang, H. Jiang, C. Liu,  
1084 Whole-exome sequencing identifies a donor splice-site variant in SMPX that causes rare X-  
1085 linked congenital deafness, Mol. Genet. Genomic Med. 7 (2019) e967.  
1086 <https://doi.org/10.1002/mgg3.967>.
- 1087 [37] A. Panigrahi, B.W. O'Malley, Mechanisms of enhancer action: the known and the unknown,  
1088 Genome Biol. 22 (2021) 1–30. <https://doi.org/10.1186/s13059-021-02322-1>.
- 1089 [38] X. Sheng, J. Wang, Y. Guo, J. Zhang, J. Luo, DNA N6-Methyladenine (6mA) Modification  
1090 Regulates Drug Resistance in Triple Negative Breast Cancer, Front. Oncol. 10 (2021) 1–6.  
1091 <https://doi.org/10.3389/fonc.2020.616098>.
- 1092 [39] Q. Lin, J. wei Chen, H. Yin, M. an Li, C. ren Zhou, T. fang Hao, T. Pan, C. Wu, Z. ran Li, D.  
1093 Zhu, H. fan Wang, M. sheng Huang, DNA N6-methyladenine involvement and regulation of  
1094 hepatocellular carcinoma development, Genomics. 114 (2022) 110265.  
1095 <https://doi.org/10.1016/j.ygeno.2022.01.002>.
- 1096 [40] M. Zamora, C.A. Ziegler, P.L. Freddolino, A.J. Wolfe, A Thermosensitive, Phase-Variable  
1097 Epigenetic Switch: pap Revisited, Microbiol. Mol. Biol. Rev. 84 (2020).  
1098 <https://doi.org/10.1128/membr.00030-17>.
- 1099 [41] R. Sanchez, S.A. Mackenzie, Integrative Network Analysis of Differentially Methylated and  
1100 Expressed Genes for Biomarker Identification in Leukemia, Sci. Rep. 10 (2020) 2123.  
1101 <https://doi.org/10.1038/s41598-020-58123-2>.
- 1102 [42] G. Ivanov, Generalizing the Baer-Kaplansky Theorem, J. Pure Appl. Algebr. 133 (1998) 107–  
1103 115. [https://doi.org/10.1016/S0022-4049\(97\)00187-4](https://doi.org/10.1016/S0022-4049(97)00187-4).
- 1104 [43] P.W. Gunning, E.C. Hardeman, Isoforms: Fundamental differences, Elife. 7 (2018) 1–3.  
1105 <https://doi.org/10.7554/eLife.34477>.
- 1106 [44] L.P. Iñiguez, G. Hernández, The evolutionary relationship between alternative splicing and  
1107 gene duplication, Front. Genet. 8 (2017) 1–7. <https://doi.org/10.3389/fgene.2017.00014>.
- 1108 [45] F.H.C. Crick, The Origin of the Genetic Code, J. Mol. Biol. 38 (1968) 367–379.
- 1109 [46] A. Cornish-Bowden, Nomenclature for incompletely specified bases in nucleic acid  
1110 sequences: recommendations 1984, Nucleic Acids Res. 13 (1985) 3021–3030.

- 1111 [47] G.V.Kass, An Exploratory Technique for Investigating Large Quantities of Categorical Data,  
1112 J. Roral Stat. Soc. 29 (1980) 119–127.
- 1113 [48] S. Miyazawa, R.L. Jernigan, Residue-Residue Potentials with a Favorable Contact Pair Term  
1114 and an Unfavorable High Packing Density Term, for Simulation and Threading, J Mol Biol.  
1115 256 (1996) 623–644. <https://doi.org/10.1006/jmbi.1996.0114>.
- 1116 [49] R. Sanchez, Evolutionary Analysis of DNA-Protein-Coding Regions Based on a Genetic Code  
1117 Cube Metric, Curr. Top. Med. Chem. 14 (2014) 407–417.  
1118 <https://doi.org/10.2174/1568026613666131204110022>.
- 1119 [50] P. Freyd, Abelian Categories: An Introduction to the Theory of Functors, Harper & Row, New  
1120 York, 1964.
- 1121 [51] B. Mitchell, The Full Imbedding Theorem, Amer. J. Math. 86 (1964) 619.  
1122 <https://doi.org/10.2307/2373027>.
- 1123 [52] Y. Maruyama, Category theory and foundations of life science: A structuralist perspective on  
1124 cognition, BioSystems. 203 (2021) 1–20. <https://doi.org/10.1016/j.biosystems.2021.104376>.
- 1125 [53] M. Yu, B. Ren, The three-dimensional organization of mammalian genomes, Annu. Rev. Cell  
1126 Dev. Biol. 33 (2017) 265–289. <https://doi.org/10.1146/annurev-cellbio-100616-060531>.
- 1127 [54] Y. Salameh, Y. Bejaoui, N. El Hajj, DNA Methylation Biomarkers in Aging and Age-Related  
1128 Diseases, Front. Genet. 11 (2020) 1–11. <https://doi.org/10.3389/fgene.2020.00171>.
- 1129 [55] L. Fuchs, Infinite Abelian Groups, Volume 2, Academic Press, 1973.
- 1130 [56] J.-P. Marquis, Category Theory, in: E.N. Zalta (Ed.), {Stanford} Encycl. Philos., {F}all 202,  
1131 Metaphysics Research Lab, Stanford University, 2021.
- 1132
